# Supplementary material for: IL-4 drives exhaustion of CD8+ CART cells
Source: PubMed Central journal article supplement — Nat Commun. 2024 Sep 12;15:7921. doi: 10.1038/s41467-024-51978-3 (PMC11393358; doi:10.1038/s41467-024-51978-3), 2024-09-12
Supplement: 41467_2024_51978_MOESM1_ESM.pdf [file 41467_2024_51978_MOESM1_ESM.pdf]

Supplementary Information for

**IL-4 Drives Exhaustion in CD8<sup>+</sup> CART Cells**

**Authors:** Carli M. Stewart<sup>1,2,3</sup>, Elizabeth L. Siegler<sup>1,4</sup>, R. Leo Sakemura<sup>1,4</sup>, Michelle J. Cox<sup>1</sup>, Truc Huynh<sup>1,4</sup>, Brooke Kimball<sup>1,4</sup>, Long Mai<sup>1,4</sup>, Ismail Can<sup>1,4</sup>, Claudia Manriquez Roman<sup>1</sup>, Kun Yun<sup>1,2,5</sup>, Olivia Sirpilla<sup>1,2,3</sup>, James H. Girsch<sup>1,2,5</sup>, Ekene Ogbodo<sup>1,4</sup>, Wazim Ismail<sup>6</sup>, Alexandre Gaspar Maia<sup>6</sup>, Justin Budka<sup>7</sup>, Jenny Kim<sup>7</sup>, Nathalie Scholler<sup>7</sup>, Mike Mattie<sup>7</sup>, Simone Filosto<sup>7</sup>, and Saad S. Kenderian<sup>1,4,8\*</sup>

<sup>1</sup>T Cell Engineering, Mayo Clinic, Rochester, MN, USA

<sup>2</sup>Mayo Clinic Graduate School of Biomedical Sciences, Mayo Clinic, Rochester, MN, USA

<sup>3</sup>Department of Molecular Pharmacology and Experimental Therapeutics, Mayo Clinic, Rochester, MN, USA

<sup>4</sup>Division of Hematology, Mayo Clinic, Rochester, MN, USA

<sup>5</sup>Department of Molecular Medicine, Mayo Clinic, Rochester, MN, USA

<sup>6</sup>Department of Lab Medicine and Pathology, Mayo Clinic, Rochester, MN, USA

<sup>7</sup>Department of Oncology, Gilead Sciences Inc., Foster City, CA, USA

<sup>8</sup>Department of Immunology, Mayo Clinic, Rochester, MN, USA

\*kenderian.saad@mayo.edu

1 **TABLES**

2 Table S1: **Antibodies used for flow cytometry experiments in this study.**

| <b>Antibody Name</b>                   | <b>Clone</b> | <b>Vendor</b>  | <b>Catalog #</b> | <b>Assay</b>                                        |
|----------------------------------------|--------------|----------------|------------------|-----------------------------------------------------|
| CD3, $\alpha$ -Hu<br>APC-Cy7           | SK7          | BioLegend      | 344818           | Proliferation and Inhibitory<br>Receptor Expression |
| CD3, $\alpha$ -Hu<br>APC               | UCHT1        | eBioscience    | 17-0038-<br>42   | Intracellular Cytokine<br>Production                |
| CD3, $\alpha$ -Hu<br>BV605             | SK7          | BioLegend      | 344836           | In vivo Blood and Organ<br>Processing               |
| CD4, $\alpha$ -Hu<br>BV785             | OKT4         | BioLegend      | 317442           | In vivo Blood and Organ<br>Processing               |
| CD4, $\alpha$ -Hu<br>FITC              | OKT4         | eBioscience    | 11-0048-<br>42   | Th1 vs. Th2                                         |
| CD8, $\alpha$ -Hu<br>PerCP             | SK1          | BioLegend      | 344708           | All panels                                          |
| CD20, $\alpha$ -Hu<br>PerCP            | 2H7          | BioLegend      | 302324           | In vivo Blood and Organ<br>Processing               |
| CD20, $\alpha$ -Hu<br>APC              | 2H7          | BioLegend      | 302310           | In vivo Blood Processing                            |
| CD45, $\alpha$ -Mouse<br>APC-eFluor780 | 30-F11       | eBioscience    | 47-0451-<br>82   | In vivo Blood and Organ<br>Processing               |
| CD45, $\alpha$ -Hu<br>BV421            | HI30         | BioLegend      | 304032           | In vivo Blood and Organ<br>Processing               |
| IL-2, $\alpha$ -Hu<br>PE-CF594         | 5344.111     | BD Biosciences | 562384           | Intracellular Cytokine<br>Production                |
| IL-4, $\alpha$ -Hu<br>APC              | MP4-<br>25D2 | BD Biosciences | 554486           | Intracellular Cytokine<br>Production                |
| IL4R, $\alpha$ -Hu<br>APC              | G077F6       | BioLegend      | 355005           | IL4R Expression Check                               |

|                                                |                |                |                |                                            |
|------------------------------------------------|----------------|----------------|----------------|--------------------------------------------|
| TNF- $\alpha$ , $\alpha$ -Hu<br>AF700          | MAb11          | BioLegend      | 502928         | Intracellular Cytokine<br>Production       |
| IFN- $\gamma$ , $\alpha$ -Hu<br>APC-efluor 780 | 4S.B3          | eBioScience    | 47-7319-<br>42 | Intracellular Cytokine<br>Production       |
| GM-CSF, $\alpha$ -Hu<br>BV421                  | BVD2-<br>21C11 | BD Biosciences | 562930         | Intracellular Cytokine<br>Production       |
| PD-1, $\alpha$ -Hu<br>BV-421                   | EH12.2H7       | BioLegend      | 329920         | In vitro Inhibitory Receptor<br>Expression |
| PD-1, $\alpha$ -Hu<br>FITC                     | MIH4           | eBioscience    | 11-9969-<br>42 | In vivo Blood and Organ<br>Processing      |
| TIM-3, $\alpha$ -Hu<br>PE                      | F38-2E2        | BioLegend      | 345006         | Inhibitory Receptor Expression             |
| CTLA-4, $\alpha$ -Hu<br>PE-Cy7                 | BNI3           | BioLegend      | 369614         | In vitro Inhibitory Receptor<br>Expression |
| LAG-3, $\alpha$ -Hu<br>FITC                    | 3DS223H        | eBioscience    | 11-2239-<br>42 | In vitro Inhibitory Receptor<br>Expression |
| CCR4, $\alpha$ -Hu<br>PerCP                    | L291H4         | BioLegend      | 359406         | Th1 vs. Th2                                |
| CCR6, $\alpha$ -Hu<br>APC                      | 11A9           | BD Biosciences | 560619         | Th1 vs. Th2                                |
| CXCR3, $\alpha$ -Hu<br>APC-Cy7                 | G02H7          | BioLegend      | 353722         | Th1 vs. Th2                                |
| Live/Dead Aqua                                 | N/A            | Invitrogen     | L34966         | All Panels                                 |
| Biotin Protein L<br>(Primary Antibody)         | N/A            | GenScript      | M00097         | CAR Detection                              |
| Streptavidin, PE<br>(Secondary Antibody)       | N/A            | BioLegend      | 405203         | CAR Detection                              |

3

4 Table S2: **Primers used for CRISPR screen library preparation.**

| Primer Name      | Sequence                                                                                                         |
|------------------|------------------------------------------------------------------------------------------------------------------|
| NGS-Lib-Fwd-1    | AATGATACGGCGACCACCGAGATCTA CACTCTTTCCCTACACGACGCTCTTCC GATCTTAAGTAGAGGCTTTATATATCT TGTGAAAGGACGAAACACC           |
| NGS-Lib-Fwd-2    | AATGATACGGCGACCACCGAGATCTA CACTCTTTCCCTACACGACGCTCTTCC GATCTATCATGCTTAGCTTTATATATC TTGTGAAAGGACGAAACACC          |
| NGS-Lib-Fwd-3    | AATGATACGGCGACCACCGAGATCTA CACTCTTTCCCTACACGACGCTCTTCC GATCTGATGCACATCTGCTTTATATAT CTGTGAAAGGACGAAACACC          |
| NGS-Lib-Fwd-4    | AATGATACGGCGACCACCGAGATCTA CACTCTTTCCCTACACGACGCTCTTCC GATCTCGATTGCTCGACGCTTTATATA TCTTGTGAAAGGACGAAACACC        |
| NGS-Lib-Fwd-5    | AATGATACGGCGACCACCGAGATCTA CACTCTTTCCCTACACGACGCTCTTCC GATCTCGATAGCAATTCGCTTTATAT ATCTTGTGAAAGGACGAAACACC        |
| NGS-Lib-Fwd-6    | AATGATACGGCGACCACCGAGATCTA CACTCTTTCCCTACACGACGCTCTTCC GATCTATCGATAGTTGCTTGCCTTTATA TATCTTGTGAAAGGACGAAACACC     |
| NGS-Lib-Fwd-7    | AATGATACGGCGACCACCGAGATCTA CACTCTTTCCCTACACGACGCTCTTCC GATCTGATCGATCCAGTTAGGCTTTAT ATATCTTGTGAAAGGACGAAACACC     |
| NGS-Lib-Fwd-8    | AATGATACGGCGACCACCGAGATCTA CACTCTTTCCCTACACGACGCTCTTCC GATCTCGATCGATTGAGCCTGCTTTA TATATCTTGTGAAAGGACGAAACACC     |
| NGS-Lib-Fwd-9    | AATGATACGGCGACCACCGAGATCTA CACTCTTTCCCTACACGACGCTCTTCC GATCTACGATCGATACACGATCGCTTT ATATATCTTGTGAAAGGACGAAACA CC  |
| NGS-Lib-Fwd-10   | AATGATACGGCGACCACCGAGATCTA CACTCTTTCCCTACACGACGCTCTTCC GATCTTACGATCGATGGTCCAGAGCTT TATATATCTTGTGAAAGGACGAAAC ACC |
| NGS-Lib-KO-Rev-1 | CAAGCAGAAGACGGCATAACGAGATTC GCCTTGGTGACTGGAGTTCAGACGTG TGCTCTCCGATCTCCGACTCGGTGCC ACTTTTTCAA                     |
| NGS-Lib-KO-Rev-2 | CAAGCAGAAGACGGCATAACGAGATAT AGCTCGTGACTGGAGTTCAGACGTG TGCTCTCCGATCTCCGACTCGGTGCC ACTTTTTCAA                      |
| NGS-Lib-KO-Rev-3 | CAAGCAGAAGACGGCATAACGAGATGA AGAAGTGTGACTGGAGTTCAGACGTG TGCTCTCCGATCTCCGACTCGGTGCC ACTTTTTCAA                     |

5

6 Table S3. Cycling Conditions for CRISPR screen library preparation.

| Cycle Number | Denature         | Anneal           | Extend           |
|--------------|------------------|------------------|------------------|
| 1            | 98°C, 3 minutes  |                  |                  |
| 2-23         | 98°C, 10 seconds | 63°C, 10 seconds | 72°C, 25 seconds |
| 24           |                  |                  | 72°C, 2 minutes  |

7

8

9 **SUPPLEMENTARY FIGURES**

Supplementary Figure S1

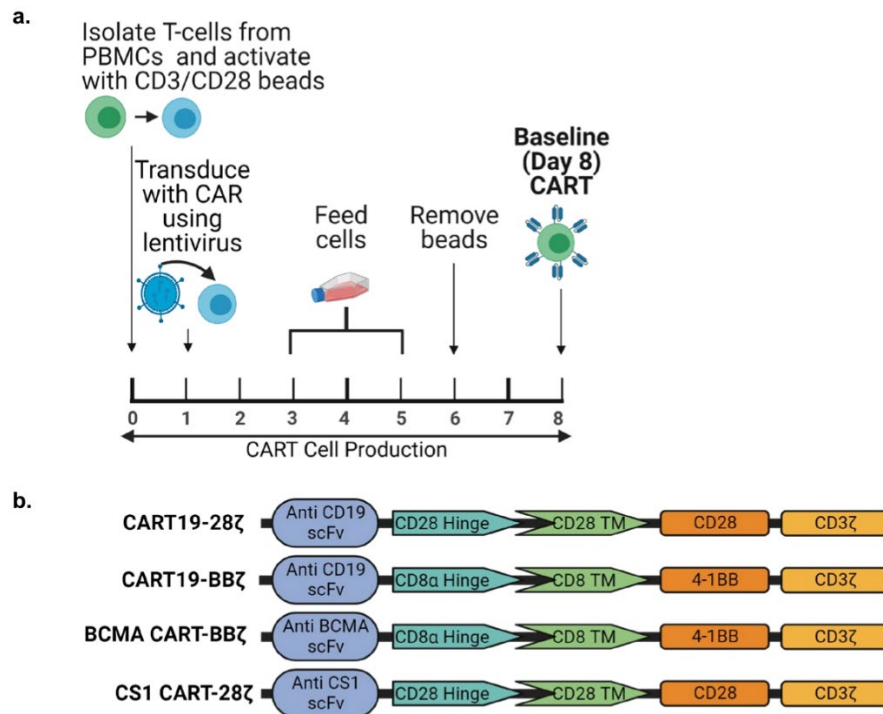

10



11 Supplementary Figure S1. **Healthy donor CART cell production for in vitro and in vivo**  
 12 **studies. a.** Schematic showing the CART cell production process for lentivirally transduced CART  
 13 cells. **b.** Schematic describing the modular domains included in the lentivirally transduced CART  
 14 cells used in in vitro and in vivo validation studies (scFv = single-chain variable fragment, TM =  
 15 transmembrane). (Supplementary Figure S1a-b was created with BioRender.com released under  
 16 a Creative Commons Attribution-NonCommercial-NoDerivs 4.0 International license)  
 17

Supplementary Figure S2

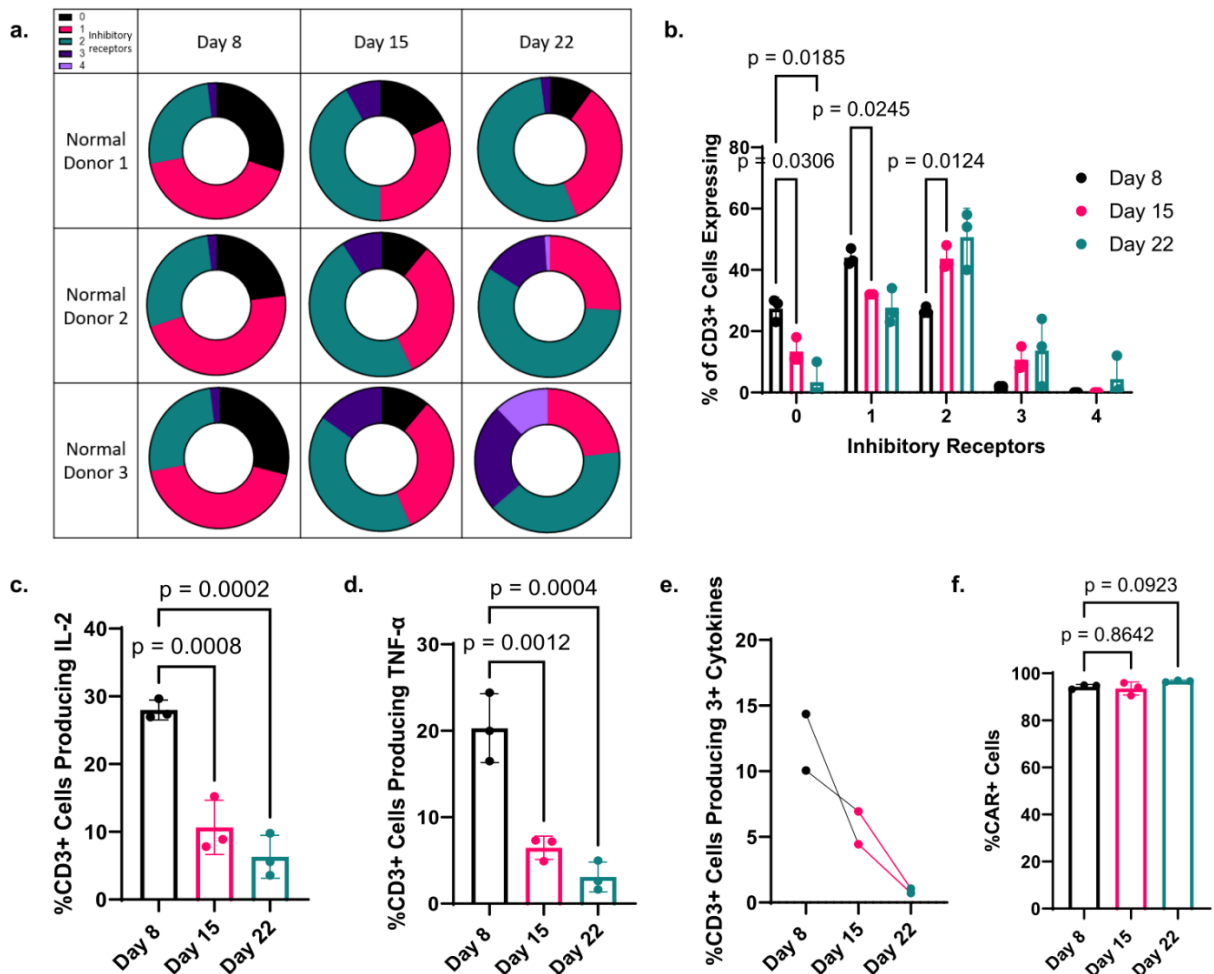

18  
 19 Supplementary Figure S2. **CART19-28ζ cells chronically stimulated by JeKo-1 target cells**  
 20 **using the in vitro model for exhaustion show phenotypical and functional signs of**

21 **exhaustion. a.** Circle plot showing the percent of CART cells expressing multiple inhibitory  
22 receptors (0 – black, 1 – pink, 2- green, 3 – dark purple, 4 – light purple) over time as determined  
23 with flow cytometric detection of CD3<sup>+</sup> cells positive for PD-1, TIM-3, CTLA-4, and/or LAG-3 on  
24 Days 8, 15, and 22 of the in vitro model for exhaustion where CART19-28ζ cells were chronically  
25 stimulated with JeKo-1 target cells. **b.** Bar graph quantifying the circle plots in **a.** (Two-way  
26 ANOVA, average of two technical replicates for three biological replicates, mean +/- SD). **c-d.**  
27 The percent of CART19-28ζ cells producing the effector cytokines IL-2 and TNF-α, respectively,  
28 on Day 8, 15, and 22. This was determined by strongly stimulating CART cells at a 1:5 E:T cell  
29 ratio for four hours before performing intracellular staining for the cytokines (One-way ANOVA,  
30 average of two technical replicates for three biological replicates, mean +/- SD). **e.** The percent  
31 of CART19-28ζ cells producing three or more cytokines after strongly stimulating them at a 1:5  
32 E:T cell ratio on Days 8, 15, and 22 of the in vitro model for exhaustion before performing  
33 intracellular staining for the following cytokines: IL-2, TNF-α, IFN-γ, and GM-CSF (Data from two  
34 biological replicates, two technical replicates per biological replicate). **f.** The percent of CAR<sup>+</sup> cells  
35 on Days 8, 15, and 22 of the in vitro model for exhaustion as determined with ProteinL staining  
36 and flow cytometry (One-way ANOVA, average of two technical replicates for three biological  
37 replicates, mean +/- SD). Source data are provided as a Source Data file.

38

Supplementary Figure S3

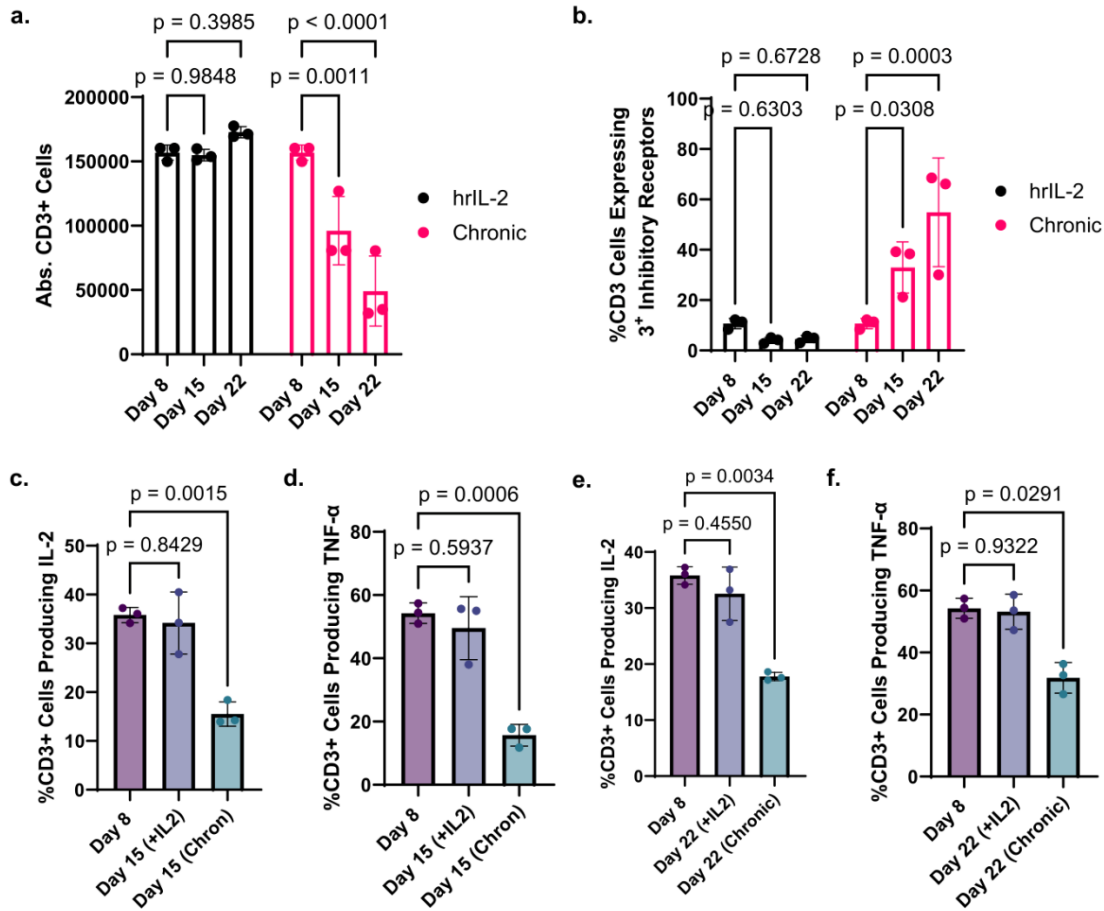

39

40 Supplementary Figure S3. **Long-term co-culture of CART cells in media supplemented with**  
 41 **hrIL-2 does not result in dysfunction.** **a.** Absolute CD3<sup>+</sup> cell count after 100,000 CART cells  
 42 were co-cultured with JeKo-1 cells at 1:1 E:T cell ratio for 5-days. Day 15 (hrIL-2) and Day 22  
 43 (hrIL-2) cells were kept in media supplemented with 100 IU/mL hrIL-2 from Day 8 to Day 15/Day  
 44 22 while Day 15 (Chronic) and Day 22 (Chronic) cells were chronically stimulated from Day 8 to  
 45 Day 15/Day 22 according to the in vitro model for exhaustion. (Two-way ANOVA, average of two  
 46 technical replicates for three biological replicates, mean +/- SD). **b.** The percent of either Day 8,  
 47 Day 15 (hrIL-2), Day 22 (hrIL-2), Day 15 (Chronic), or Day 22 (Chronic) cells that express 0, 1, 2,  
 48 3, or 4 inhibitory receptors as determined by flow cytometric detection of CD3<sup>+</sup> cells positive for  
 49 PD-1, TIM-3, CTLA-4, and LAG-3 (Two-way ANOVA, average of two technical replicates for three  
 50 biological replicates, mean +/- SD). **c-f.** The percent of CD3<sup>+</sup> cells producing IL-2 and TNF- $\alpha$  after  
 51 either Day 8, Day 15 (hrIL-2), Day 22 (hrIL-2), Day 15 (Chronic), or Day 22 (Chronic) cells were  
 52 co-cultured with JeKo-1 cells at a 1:5 E:T ratio for 4 hours as determined with intracellular staining

53 for flow cytometry (One-way ANOVA, average of two technical replicates for three biological  
 54 replicates, mean +/- SD) Source data are provided as a Source Data file.  
 55

Supplementary Figure S4

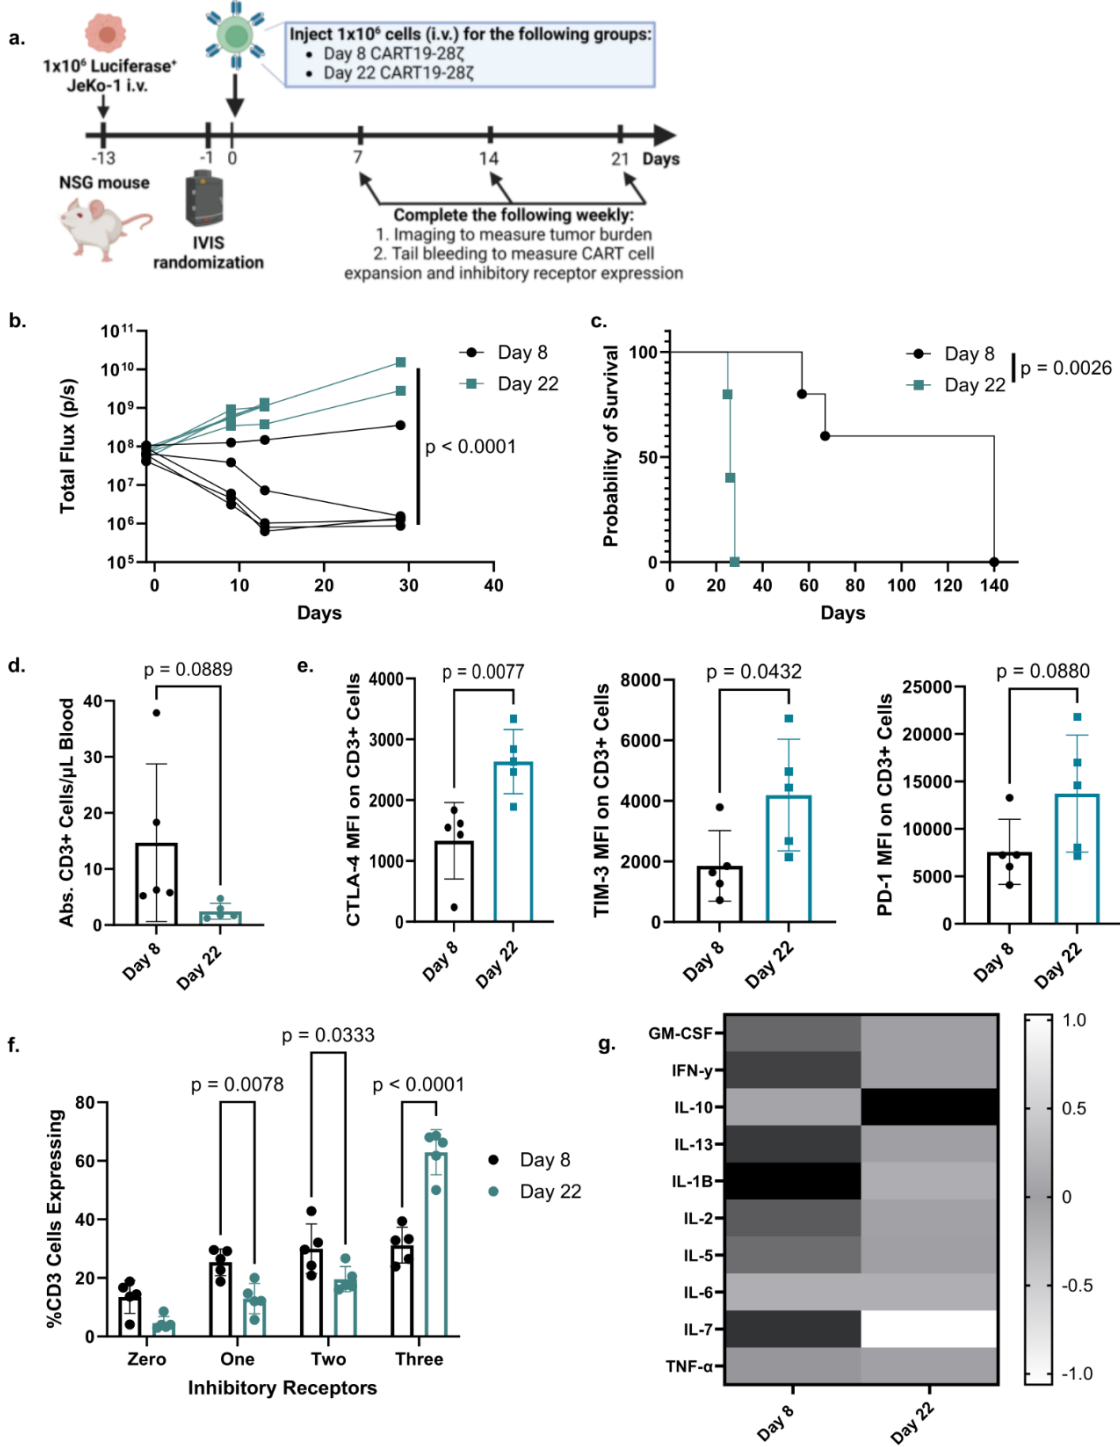

57 Supplementary Figure S4. **Day 22 CART19-28 $\zeta$  cells from the in vitro model for exhaustion**  
58 **showed reduced overall efficacy in two separate mantle cell lymphoma xenograft mouse**  
59 **models with different T cell donors. a.** Schematic depicting an in vivo mantle cell lymphoma  
60 xenograft mouse model to induce stress in CART19 cells (Supplementary Figure S4a was created  
61 with BioRender.com released under a Creative Commons Attribution-NonCommercial-NoDerivs  
62 4.0 International license). **b.** Tumor burden over time in a mantle cell lymphoma xenograft mouse  
63 model as determined by bioluminescence imaging of the luciferase<sup>+</sup> tumor (Two-way ANOVA,  
64 n=5 mice per group, results from replicate experiment). **c.** Overall survival curve of mice in a  
65 mantle cell lymphoma xenograft mouse model (Log-rank (Mantel-Cox) test, n=5 mice per group,  
66 results from replicate experiment). **d.** Absolute human CD3<sup>+</sup> cells per  $\mu$ L of peripheral blood as  
67 determined by flow cytometry on Day 14 of a mantle cell lymphoma xenograft mouse model (two-  
68 sided t-test, n=5 mice per group, results from replicate experiment, mean +/- SD). **e.** Mean  
69 fluorescence intensity of the inhibitory receptors CTLA-4, TIM-3, and PD-1 on human CD3<sup>+</sup> cells  
70 in the peripheral blood of mice treated with either Day 8 or Day 22 CART19-28 $\zeta$  cells on Day 14  
71 of a mantle cell lymphoma xenograft mouse model (two-sided t-test, n=5 mice per group, mean  
72 +/- SD, results from replicate experiment). **f.** The percent of CART19-28 $\zeta$  cells expressing multiple  
73 inhibitory receptors on Day 15 of a mantle cell lymphoma xenograft mouse model. This was  
74 determined through tail vein bleeding and flow cytometric detection of human CD3<sup>+</sup> cells that are  
75 positive for PD-1, TIM-3, and/or CTLA-4 (Two-way ANOVA, n=5 mice per group, mean +/- SD).  
76 **g.** Heat map showing median of normalized values for cytokine concentration from each group of  
77 mice in the mantle cell lymphoma xenograft mouse model treated with either Day 8 or Day 22  
78 CART19-28 $\zeta$  cells (n=5 mice per group). Source data are provided as a Source Data file.

Supplementary Figure S5

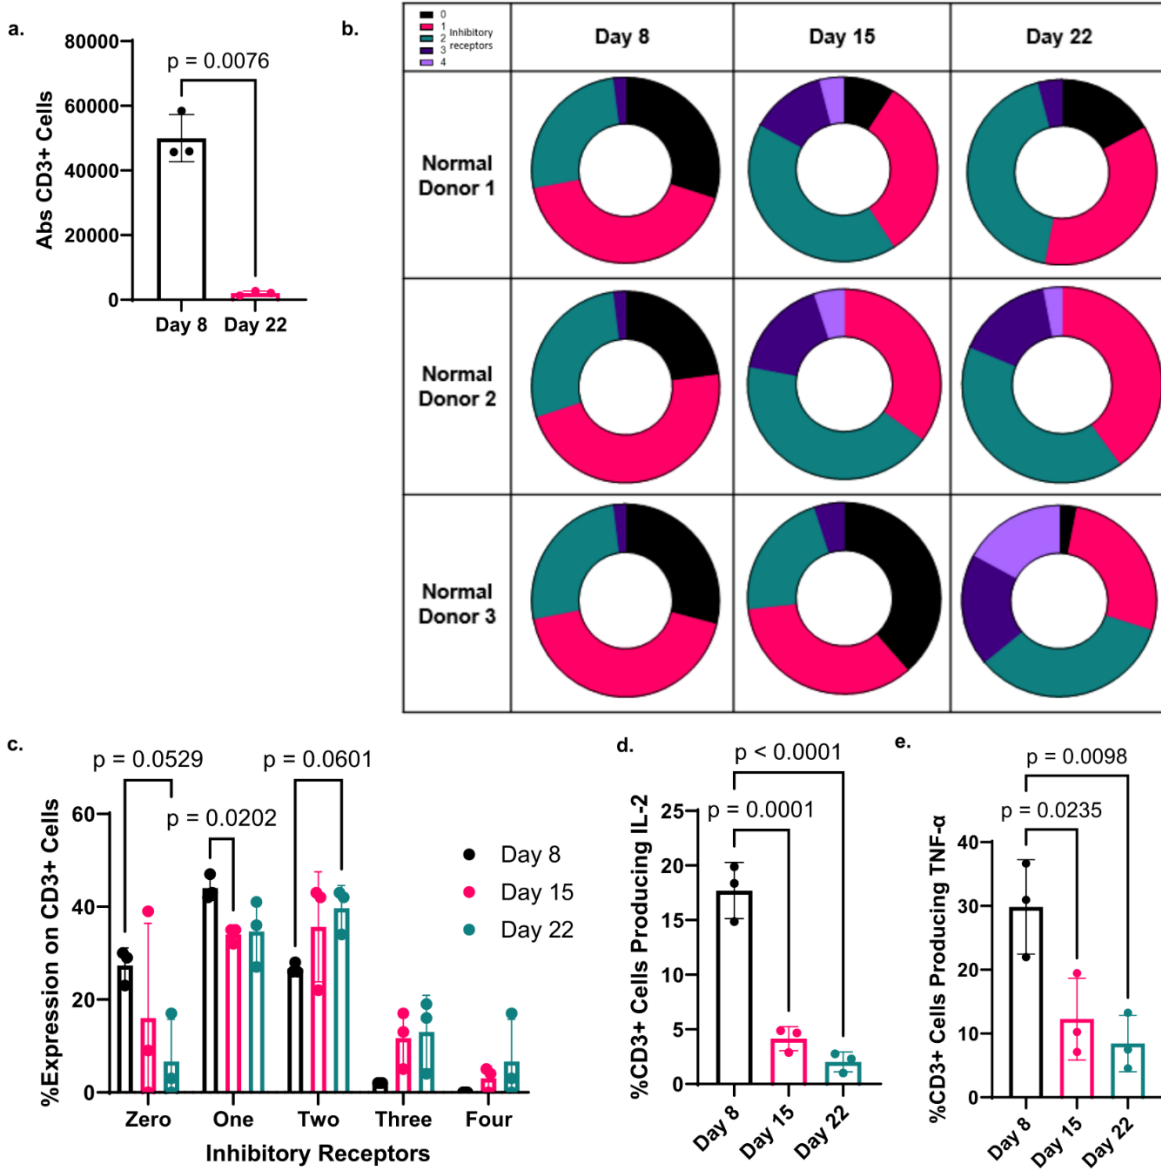

79

80 Supplementary Figure S5. **Chronic stimulation of CART19-28ζ cells with the CD19<sup>+</sup> acute**  
 81 **lymphoblastic leukemia (ALL) cell line, NALM6, using the in vitro model for exhaustion**  
 82 **results in phenotypical and functional signs of exhaustion.** **a.** The absolute count of CD3<sup>+</sup> T  
 83 cells as determined with flow cytometry following co-culture of either Day 8 or Day 22 CART19-  
 84 28ζ cells with NALM6 target cells at a 1:1 E:T cell ratio for 5-days (two-sided t-test , average of  
 85 two technical replicates for three biological replicates, mean +/- SD). **b.** Circle plot showing the

86 percent of CART cells expressing multiple inhibitory receptors (0 – black, 1 – pink, 2- green, 3 –  
 87 dark purple, 4 – light purple) over time as determined with flow cytometric detection of CD3<sup>+</sup> cells  
 88 positive for PD-1, TIM-3, CTLA-4, and/or LAG-3 on Days 8, 15, and 22 of the in vitro model for  
 89 exhaustion where CART19-28ζ cells were chronically stimulated with NALM6 target cells. **c.** Bar  
 90 graph quantifying the circle plots in **b.** (Two-way ANOVA, average of two technical replicates for  
 91 three biological replicates, mean +/- SD). **d-e.** The percent of CD3<sup>+</sup> cells producing IL-2 and TNF-  
 92 α as determined with intracellular staining and flow cytometry after either Day 8, Day 15, or Day  
 93 22 CART19-28ζ cells were co-cultured with NALM-6 cells at a 1:5 E:T cell ratio for four hours  
 94 (One-way ANOVA, average of two technical replicates for three biological replicates, mean +/-  
 95 SD). Source data are provided as a Source Data file.

Supplementary Figure S6

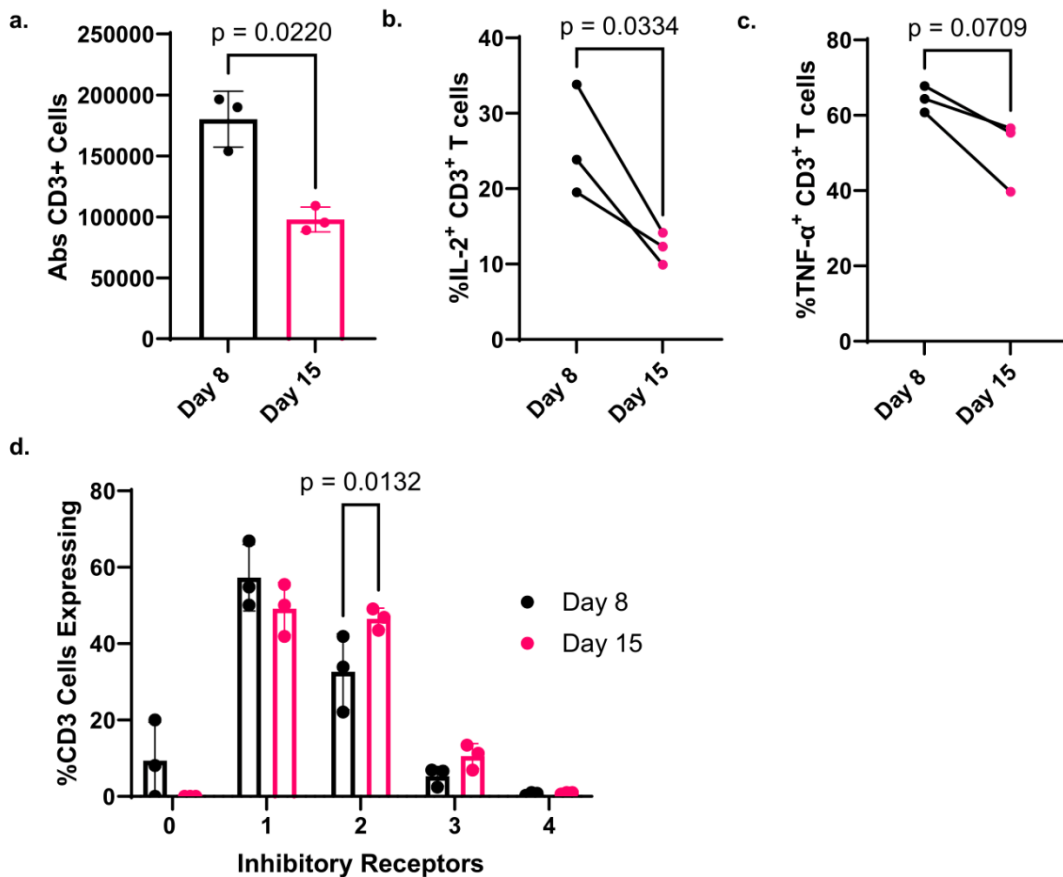

97 Supplementary Figure S6. **Chronic stimulation of CART19-BB $\zeta$  cells with CD19<sup>+</sup> JeKo-1 cells**  
 98 **using the in vitro model for exhaustion results in phenotypic and functional signs of**  
 99 **exhaustion. a.** Absolute CD3<sup>+</sup> count as determined with flow cytometry after culturing either Day  
 100 8 or Day 15 CART19-BB $\zeta$  cells with JeKo-1 cells for 5-days at a 1:1 E:T cell ratio (Paired t-test,  
 101 average of two technical replicates for three biological replicates, mean +/- SD). **b-c.** The percent  
 102 of CART19-BB $\zeta$  cells producing either IL-2 or TNF- $\alpha$  as determined by intracellular staining for  
 103 flow cytometry after stimulating either Day 8 or Day 15 CART cells at a 1:5 E:T ratio for four hours  
 104 (Paired t-test, average of two technical replicates for three biological replicates). **d.** The percent  
 105 of CART19-BB $\zeta$  cells positive for either 0, 1, 2, 3, or 4 inhibitory receptors as determined with flow  
 106 cytometry on Day 8 and Day 15 of the in vitro model for exhaustion after staining for PD-1, TIM-  
 107 3, CTLA-4, and LAG-3 (Two-way ANOVA, average of two technical replicates for three biological  
 108 replicates, mean +/- SD). Source data are provided as a Source Data file.

Supplementary Figure S7

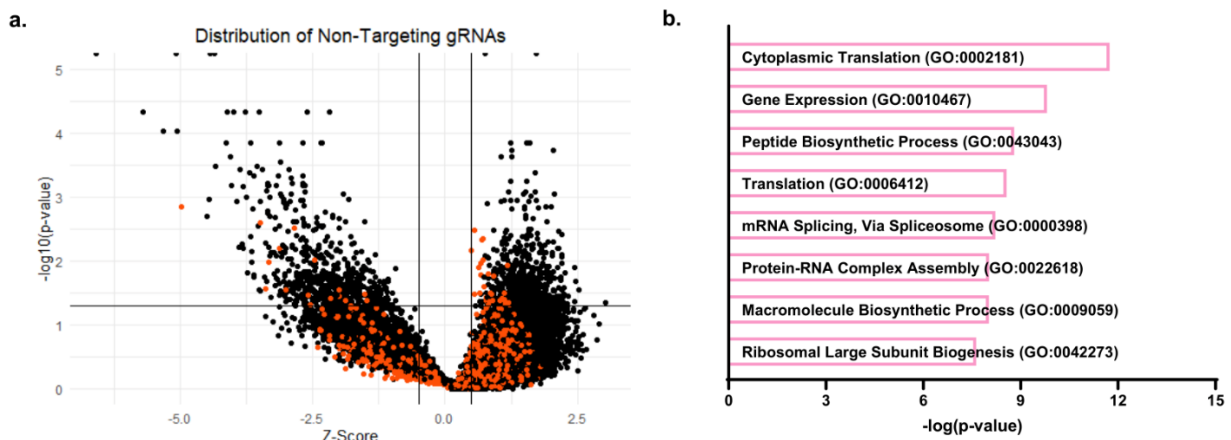

109  
 110 Supplementary Figure S7. **Plots to determine quality of the genome-wide CRISPR screen. a.**  
 111 Volcano plot showing the distribution of positively and negatively selected gRNAs in the genome-  
 112 wide CRISPR screen by Day 22 as compared to Day 8. Red dots represent the 1,000 non-  
 113 targeting gRNAs utilized in the screen (three biological replicates, MAGeCK-VISPR MLE  
 114 analysis). **b.** Gene set enrichment analysis of negatively selected genes (FDR < 0.25) by Day 22



115 of the genome-wide CRISPR knockout screen (three biological replicates, MAGeCK-VISPR MLE  
 116 analysis and normalization to the list of non-targeting gRNAs).

Supplementary Figure S8

a.

|        | Molecule Type           | P-Value  |
|--------|-------------------------|----------|
| LARP1  | Translation Regulator   | 3.85E-12 |
| PA2G4  | Transcription Regulator | 1.88E-14 |
| IL4R   | Transmembrane Receptor  | 3.51E-14 |
| CCNG1  |                         | 3.84E-14 |
| MLXIPL | Transcription Regulator | 5.70E-14 |

b.

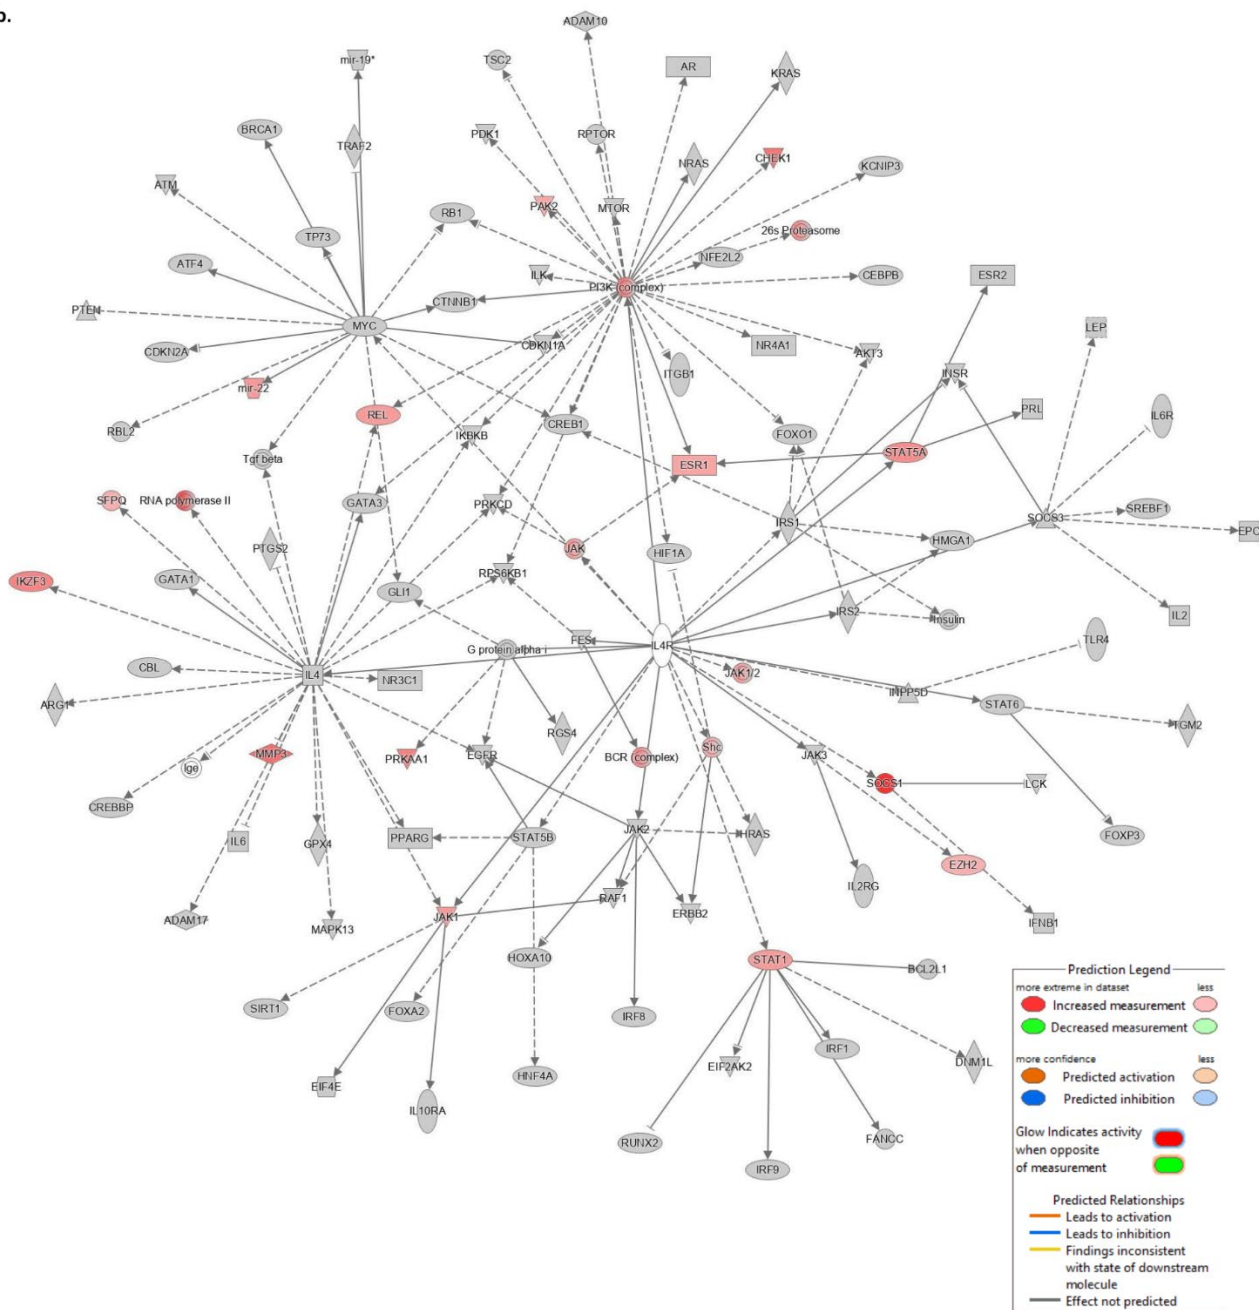

118 Supplementary Figure S8. **Ingenuity pathway analysis of positively selected genes in the**  
119 **genome-wide CRISPR knockout screen. a.** Top five causal networks identified through analysis  
120 of genes that were positively selected for by Day 22 of the genome-wide CRISPR knockout  
121 screen. **b.** QIAGEN IPA network for IL4R and affected genes as identified in the list of positively  
122 selected genes. (Positive selection in the CRISPR screen was defined as FDR<0.25 with  
123 MAGeCK-VISPR MLE analysis)

Supplementary Figure S9

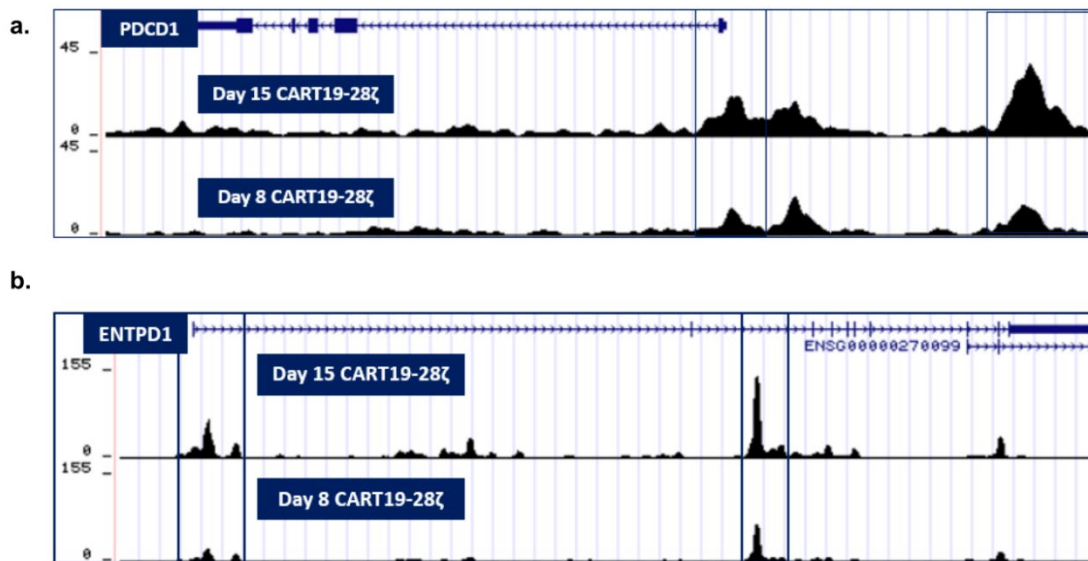

124  
125 Supplementary Figure S9. **Chromatin accessibility interrogation of baseline and chronically**  
126 **stimulated CART19-28ζ cells from the in vitro model for exhaustion reveal key epigenetic**  
127 **signatures of exhaustion. a-b.** ATAC signal track of selected gene loci (*PDCD1* and *ENTPD1*)  
128 showing averaged signal for the three biological replicates at each timepoint as visualized with  
129 the UCSC genome browser.

Supplementary Figure S10

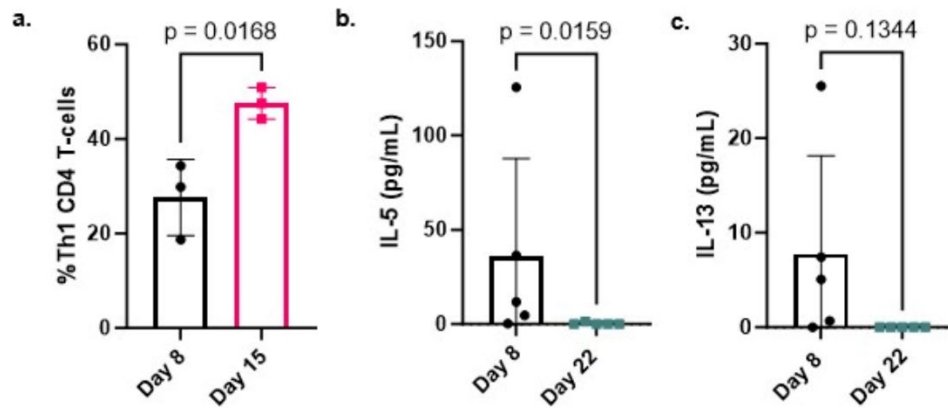

130

131 Supplementary Figure S10. **Changes in the Th1/Th2 pathway during the in vitro model for**

132 **exhaustion. a.** The percent of Th1 CD4<sup>+</sup> CART19-28ζ cells as defined by CCR6<sup>-</sup>CCR4<sup>-</sup>CXCR3<sup>+</sup>

133 cells by flow cytometry (t-test, average of two technical replicates for three biological replicates,

134 mean +/- SD). **b-c.** The concentration of IL-5 and IL-13 in the serum by Multiplex assay of JeKo-

135 1 xenograft mice two weeks after the injection of either Day 8 or Day 22 CART19-28ζ cells (two-

136 sided t-test, n=5 mice per group, mean +/- SD). Source data are provided as a Source Data file.

Supplementary Figure S11

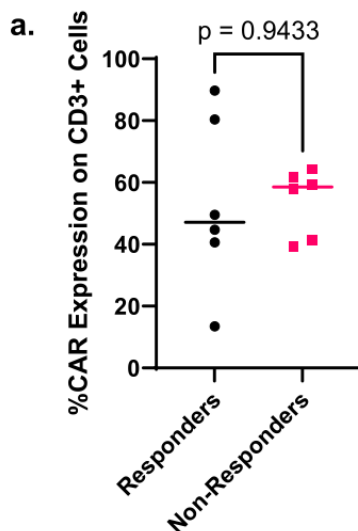

137

138 Supplementary Figure S11. **No difference in CAR<sup>+</sup> T cells in the pre-infusion products from**

139 **responders and non-responders in the ZUMA-1 clinical trial. a.** The percent of CD3<sup>+</sup> cells

140 expressing CAR as determined by positive staining for an anti-Whitlow linker antibody using flow  
141 cytometry. (two-sided t-test, n=6 responder and n=6 non-responder samples, median value)  
142 Source data are provided as a Source Data file.

Supplementary Figure S12

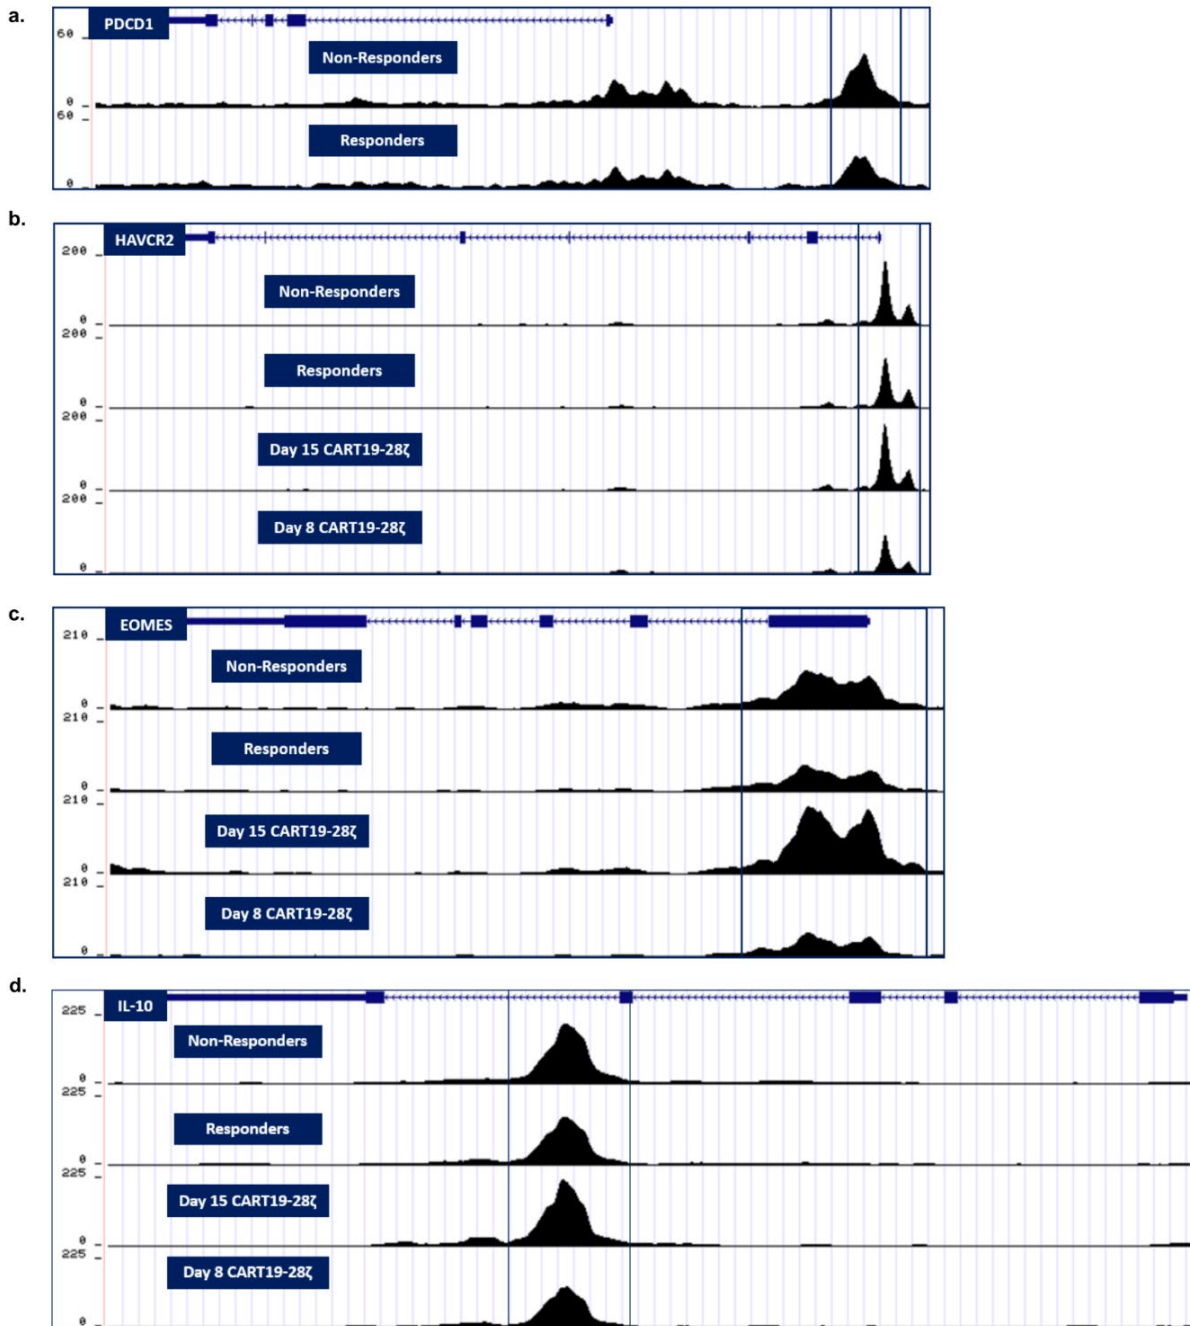

144 Supplementary Figure S12. **Chromatin accessibility analysis of pre-infusion axi-cel products**  
145 **from 6 responders and 6 non-responders in the ZUMA-1 clinical trial. a-d.** ATAC signal track  
146 of selected exhaustion-related gene loci (*PDCD1*, *HAVCR2* (TIM-3), *EOMES*, *IL-10*) based on  
147 averaged signal for the biological replicates for each condition (n=6 for responders and n=6 for  
148 non-responders; n=3 for Day 15 and n= 3 Day 8 CART29-28ζ).

Supplementary Figure S13

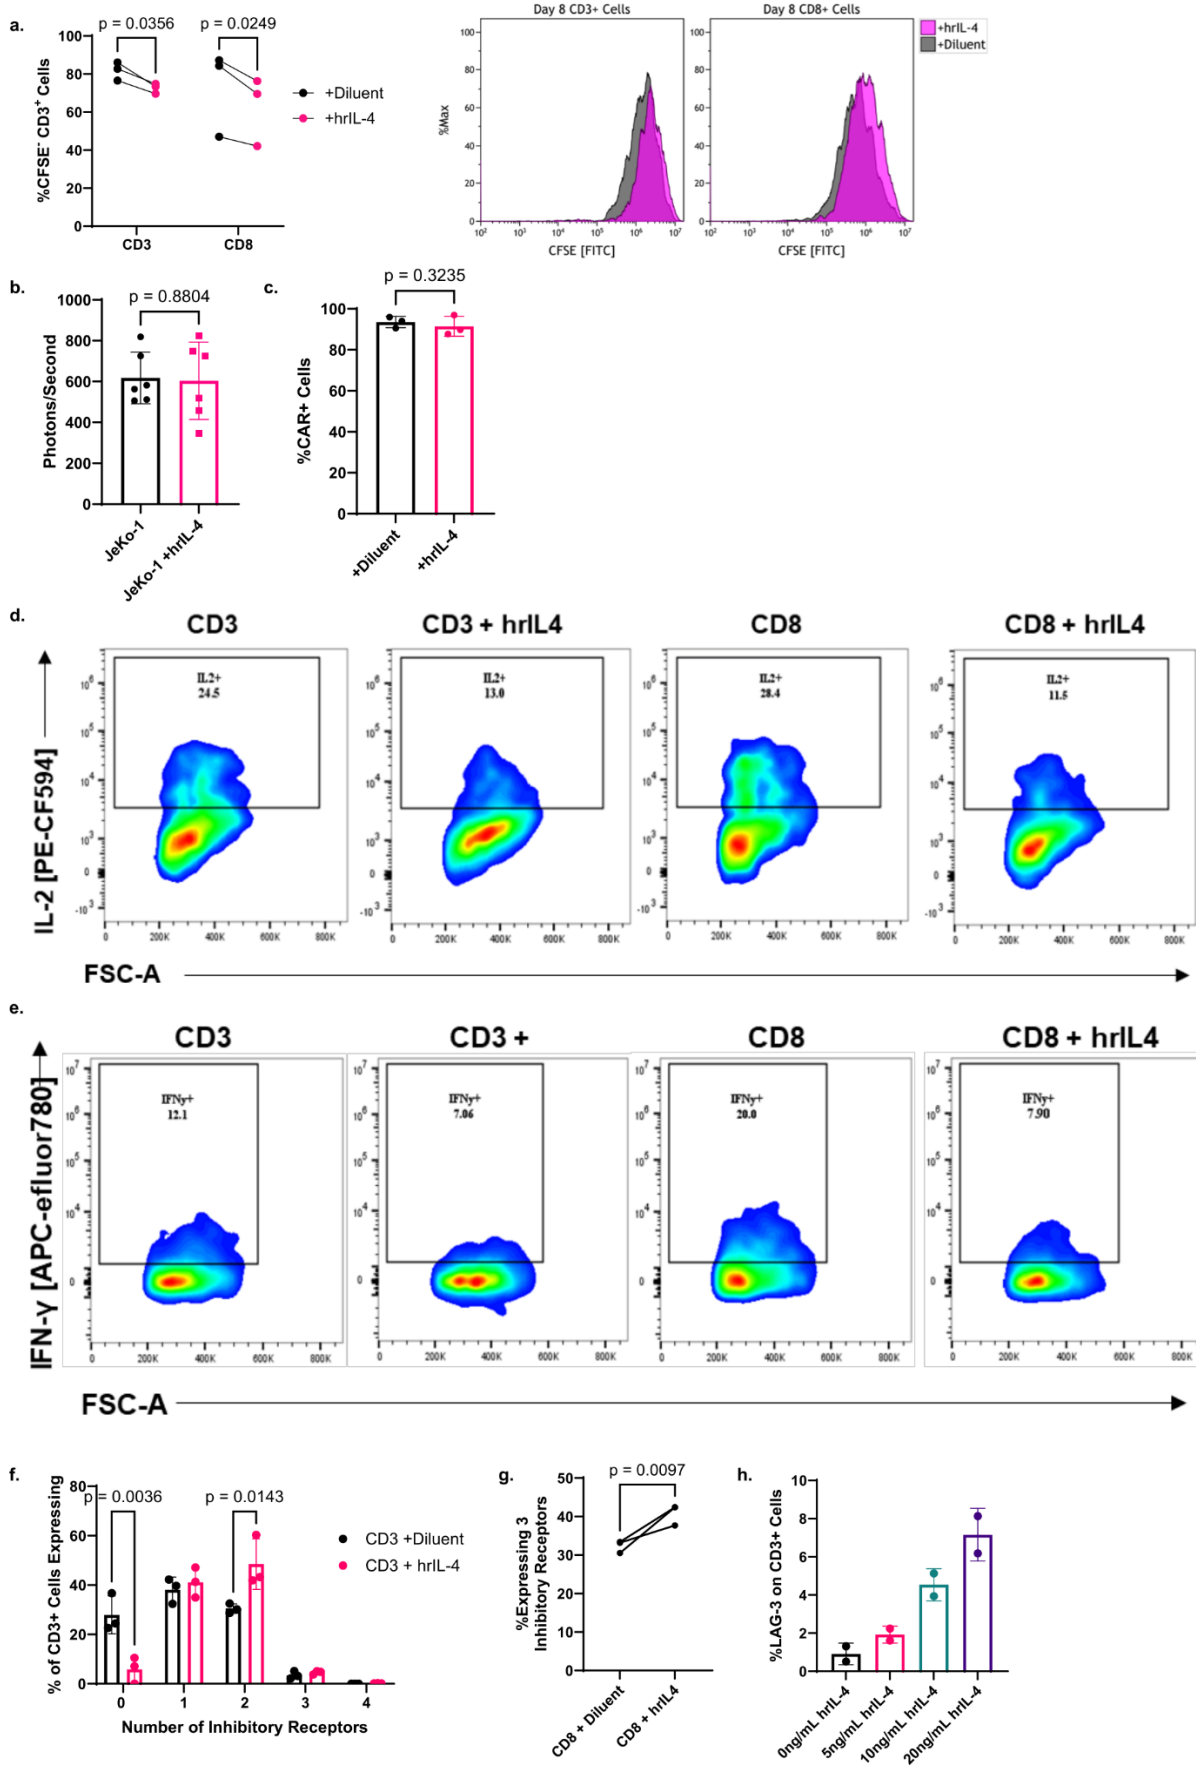

150 Supplementary Figure S13. **The effect of treatment with human recombinant IL-4 (hrIL-4) in**  
151 **vitro. a.** Line graph and representative histogram from one biological replicate showing the shift  
152 in CFSE staining as determined by flow cytometry after CFSE labeled bulk or CD8<sup>+</sup> CART cells  
153 were co-cultured with JeKo-1 tumor cells for 5-days (Two-way ANOVA, three biological  
154 replicates). **b.** The luminescence (photons/second) of luciferase<sup>+</sup> JeKo-1 cells after 48 hours of  
155 treatment with either diluent or 20ng/mL hrIL-4 (two-sided t-test, six technical replicates, mean +/-  
156 SD). **c.** The percent of CAR<sup>+</sup> cells following chronic stimulation (Day 15) in the presence of diluent  
157 or 20ng/mL hrIL-4 as determined with ProteinL staining for flow cytometry. (two-sided t-test,  
158 average of two technical replicates for three biological replicates, mean +/- SD) **d-e.**  
159 Representative flow plots showing the percent of CD3<sup>+</sup> cells producing IL-2 and IFN- $\gamma$  as  
160 determined with intracellular staining and flow cytometry after Day 15 bulk or CD8<sup>+</sup> CART19-28 $\zeta$   
161 cells, chronically stimulated in the presence of either diluent or 20ng/mL hrIL-4, were co-cultured  
162 with JeKo-1 cells at a 1:5 E:T cell ratio for four hours. **f.** The percent of CD3<sup>+</sup> cells expressing 0,  
163 1, 2, 3, or 4 inhibitory receptors after bulk (CD3<sup>+</sup>) CART19-28 $\zeta$  cells were chronically stimulated  
164 with JeKo-1 cells in the presence of either diluent or 20ng/mL hrIL-4 from Day 8 to Day 15 of the  
165 in vitro model for exhaustion. Determined through flow cytometric staining for CD3, PD-1, CTLA-  
166 4, TIM-3, and LAG-3 (Two-way ANOVA, average of two technical replicates for three biological  
167 replicates, mean +/- SD). **g.** The percent of CD3<sup>+</sup> cells expressing 3 inhibitory receptors after  
168 isolated CD8 CART19-28 $\zeta$  cells were kept in media supplemented with 100 IU/mL hrIL-4 and  
169 chronically stimulated in the presence of either diluent or 20ng/mL hrIL-4 from Day 8 to Day 15 of  
170 the in vitro model for exhaustion. Determined through flow cytometric staining for CD3, PD-1,  
171 CTLA-4, TIM-3, and LAG-3 (two-sided t-test, average of two technical replicates for three  
172 biological replicates). **h.** The percent of CART19-28 $\zeta$  cells expressing the inhibitory receptor LAG-  
173 3 after one week of chronic stimulation with JeKo-1 cells in the presence of either 0, 5, 10, or

174 20ng/mL hrIL-4 (two technical replicates, one biological replicate). Source data are provided as a  
175 Source Data file.

Supplementary Figure S14

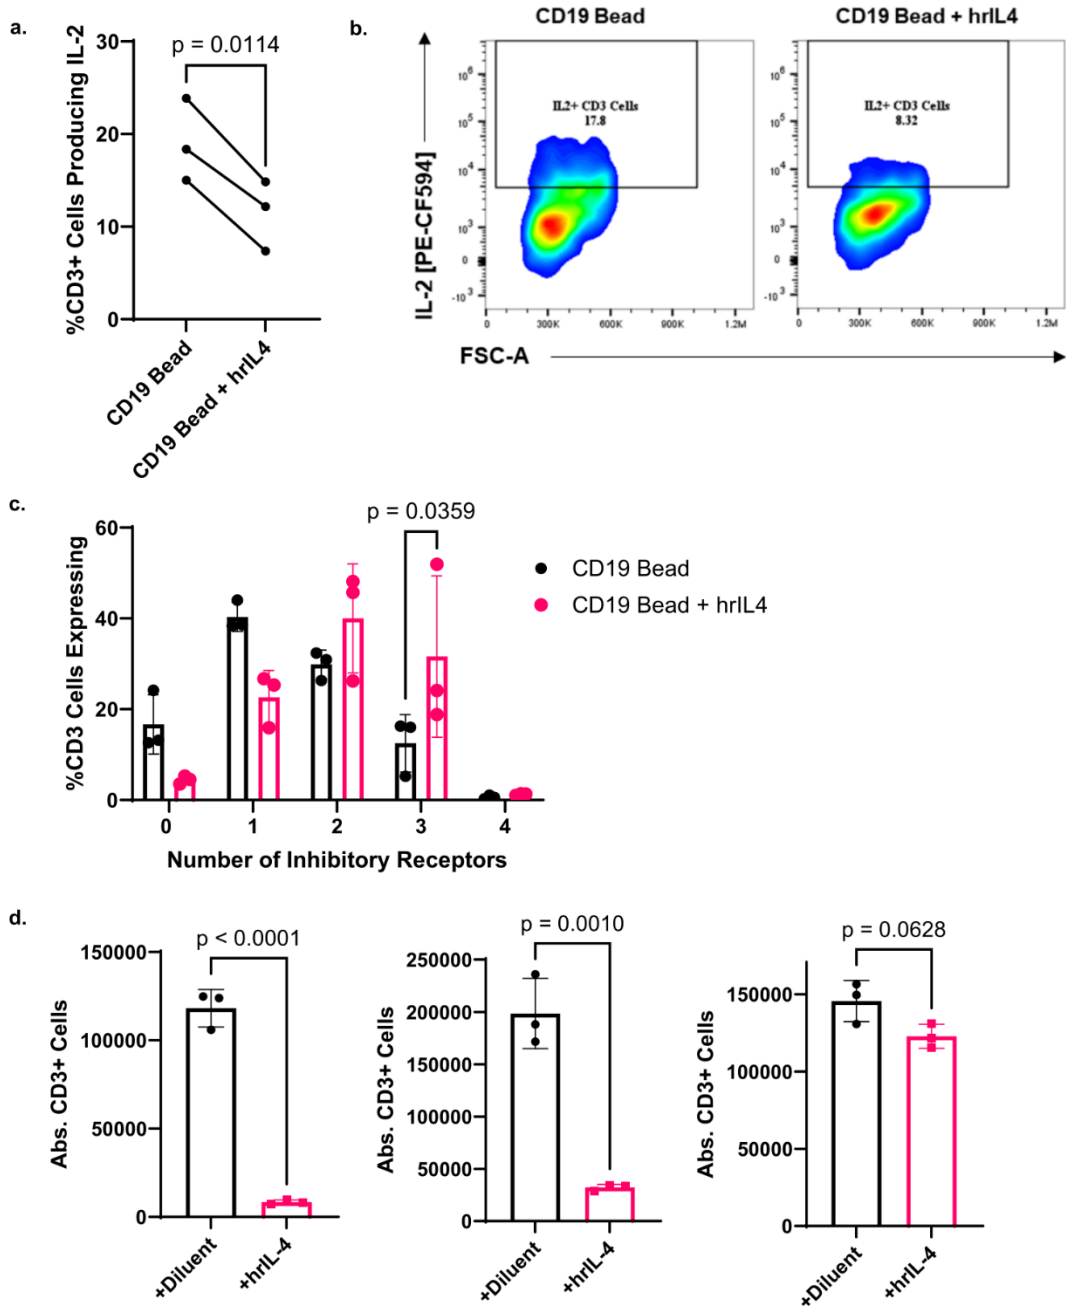

176  
177 Supplementary Figure S14. **IL-4-driven CART cell exhaustion is independent of tumor cells.**  
178 **a-b.** Line graph and representative flow plots showing the percent of CART cells producing IL-2



179 following chronic stimulation from Day 8 to Day 15 with CD19 beads in the presence of either  
180 diluent or 20ng/mL hrIL-4. CART cell production of IL-2 was determined through intracellular  
181 staining for flow cytometry following four hours of co-culture with JeKo-1 cells at a 1:5 E:T ratio  
182 (Paired two-sided t-test, average of two technical replicates for three biological replicates). **c.** The  
183 percent of CART19-28 $\zeta$  cells expressing 0, 1, 2, 3, or 4 inhibitory receptors after CART19-28 $\zeta$   
184 cells were chronically stimulated with CD19 beads either in the presence of diluent or 20ng/mL  
185 hrIL-4 from Day 8 to Day 15 of the in vitro model for exhaustion (Two-way ANOVA, average of  
186 two biological replicates for three biological replicates, mean +/- SD). **d.** Plots from three biological  
187 replicates comparing absolute CD3<sup>+</sup> count after CART cells that have been chronically stimulated  
188 from Day 8 to Day 15 in the presence of either diluent or hrIL-4 are co-cultured with JeKo-1 cells  
189 at a 1:1 E:T ratio for five days. (Unpaired two-sided t-test, three technical replicates per biological  
190 replicate, mean +/- SD). Source data are provided as a Source Data file.

Supplementary Figure S15

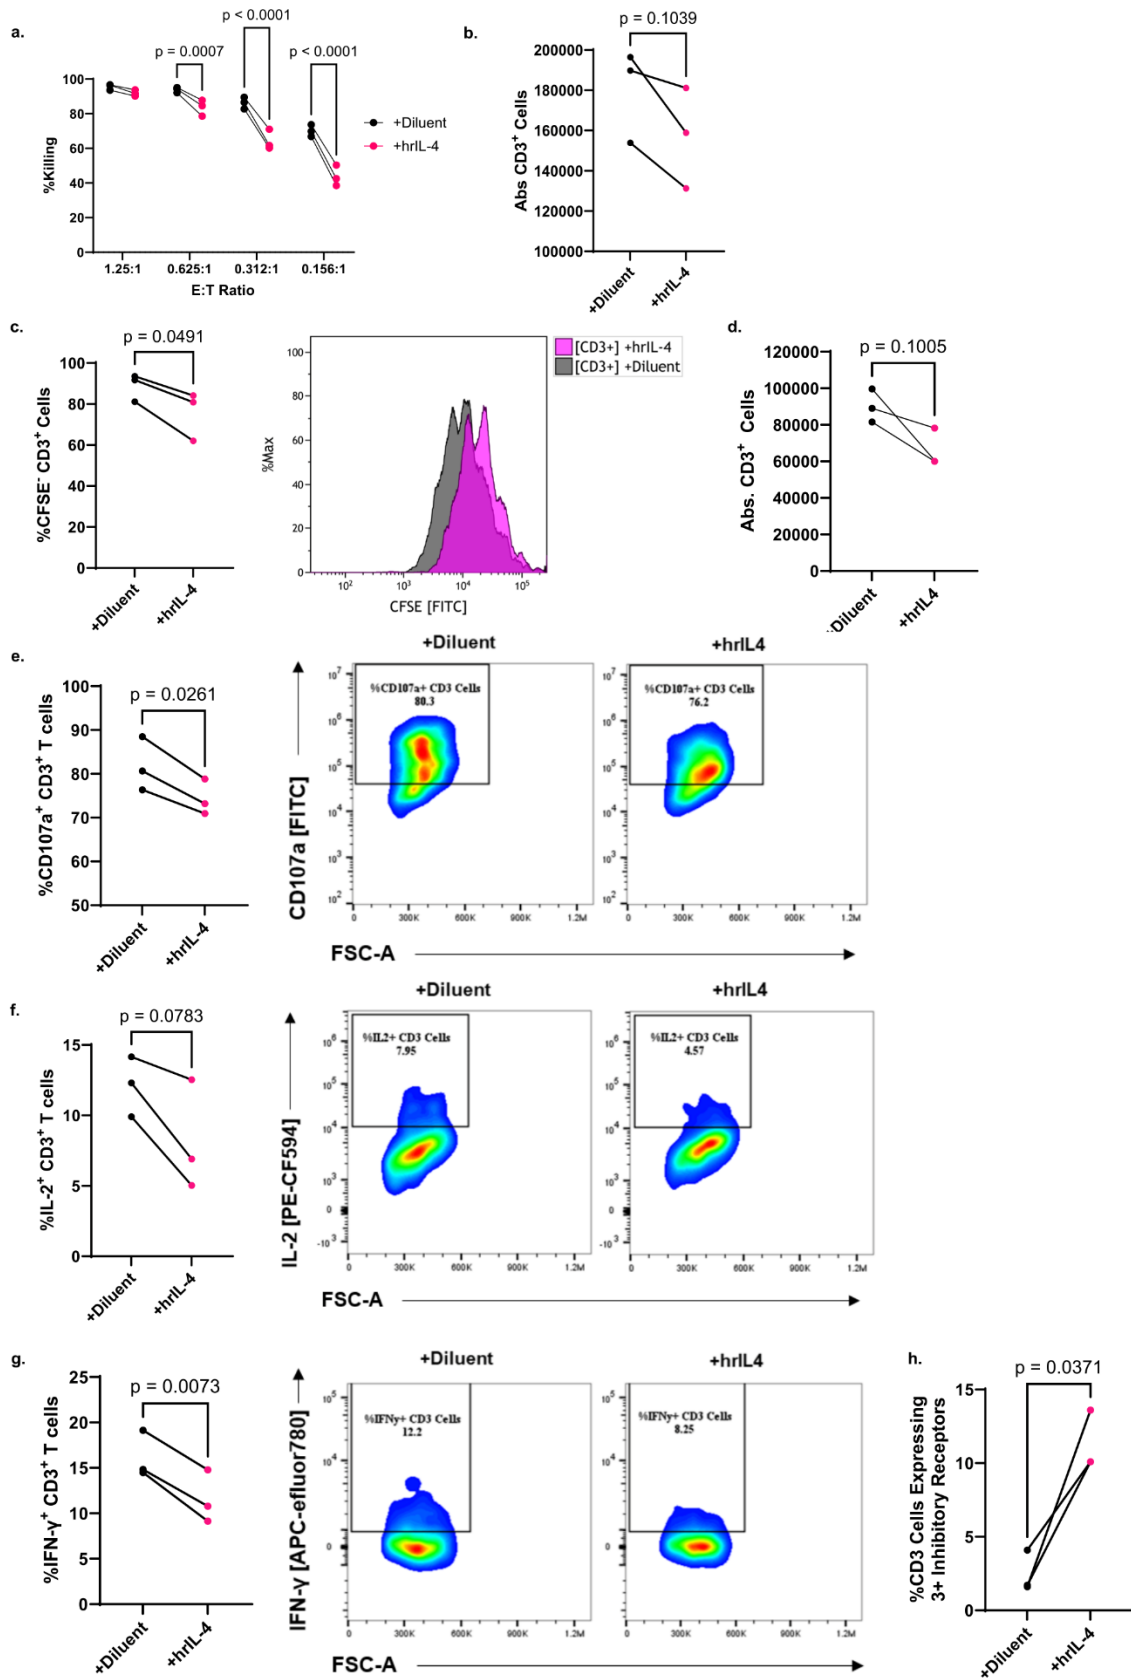

192 Supplementary Figure S15. **IL-4 drives exhaustion in CART19 cells containing a 4-1BB**  
193 **costimulatory domain (CART19-BBζ).** **a.** Percent killing as measured with bioluminescent  
194 imaging after Day 8 CART19-BBζ cells were co-cultured with luciferase<sup>+</sup> JeKo-1 cells at various  
195 E:T cell ratios for 48 hours in the presence of either 20ng/mL human recombinant IL-4 (hrIL-4) or  
196 diluent (Two-way ANOVA, average of two technical replicates for three biological replicates). **b.**  
197 Absolute CD3<sup>+</sup> cell count as measured with flow cytometry after Day 8 CART19-BBζ cells were  
198 co-cultured with JeKo-1 cells at a 1:1 E:T cell ratio for five days in the presence of either 20ng/mL  
199 hrIL-4 or diluent. (Paired two-sided t-test, average of two technical replicates for three biological  
200 replicates). **c.** Line graph and representative histogram showing the change in CFSE stained cells  
201 as determined by flow cytometry after CFSE<sup>+</sup> Day 8 CART cells were co-cultured with JeKo-1  
202 tumor cells for 5-days (Paired two-sided t-test, three biological replicates). **d.** Absolute CD3<sup>+</sup> cell  
203 count as measured with flow cytometry after Day 15 CART19-BBζ cells were co-cultured with  
204 JeKo-1 cells at a 1:1 E:T cell ratio for five days. Day 15 CART cells were chronically stimulated in  
205 the presence of either 20ng/mL hrIL-4 or diluent (Paired two-sided t-test, average of two technical  
206 replicates for three biological replicates). **e.** Line graph and representative flow plot showing the  
207 percent of cells expressing CD107a after chronic stimulation from Day 8 to Day 15 in the presence  
208 of either 20ng/mL hrIL-4 or diluent. Measured with flow cytometry after co-culturing the Day 15  
209 cells with JeKo-1 cells at a 1:5 E:T ratio for four hours (Paired two-sided t-test, average of two  
210 technical replicates for three biological replicates). **f-g.** Line graphs and representative flow plots  
211 showing the percent of CD3<sup>+</sup> cells producing IL-2 and IFN-γ as determined with intracellular  
212 staining and flow cytometry after Day 15 CART19-BBζ cells, chronically stimulated in the  
213 presence of either diluent or 20ng/mL hrIL-4, were co-cultured with JeKo-1 cells at a 1:5 E:T cell  
214 ratio for four hours (Paired two-sided t-test, average of two technical replicates for three biological  
215 replicates). **h.** The percent of CD3<sup>+</sup> cells expressing three or more inhibitory receptors after  
216 chronic stimulation from Day 8 to Day 22 in the presence of diluent or 20ng/mL of hrIL-4.

217 Measured with flow cytometry after staining for CD3, PD-1, CTLA-4, TIM-3, and LAG-3 (Paired  
 218 two-sided t-test, average of two technical replicates for three biological replicates). Source data  
 219 are provided as a Source Data file.

Supplementary Figure S16

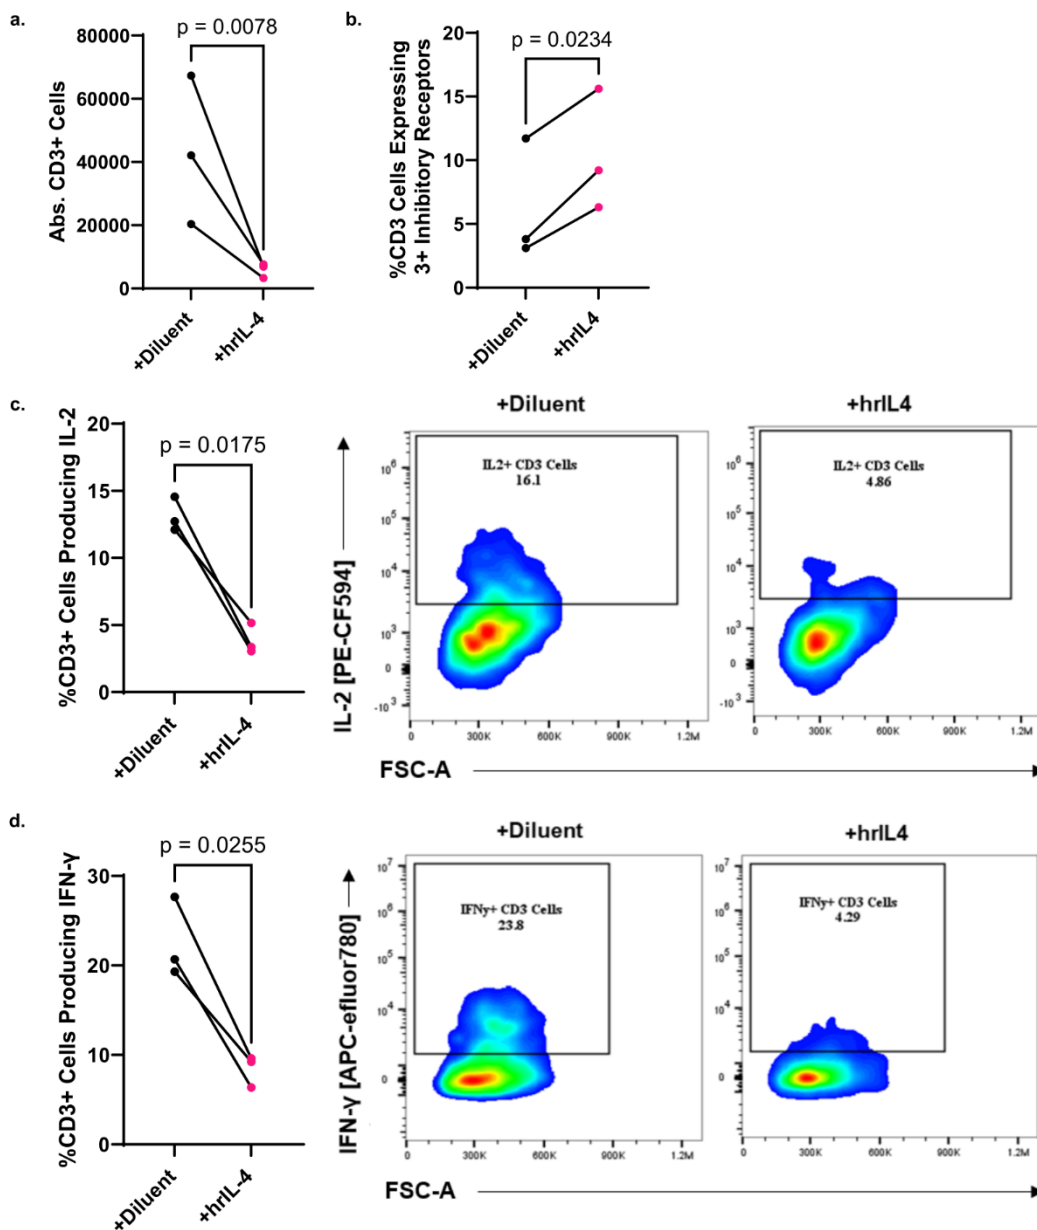

220  
 221 Supplementary Figure S16. **IL-4 causes CART cell dysfunction in CART cells targeting**  
 222 **BCMA and containing a 4-1BB costimulatory domains (BCMA CART-BBζ).** a-d. BCMA  
 223 CART-BBζ cells were chronically stimulated with OPM-2 tumor cells in the presence of either

224 20ng/mL hrIL-4 or diluent from Day 8 to Day 22 of the in vitro model for exhaustion. **a.** Absolute  
225 count of CD3<sup>+</sup> cells after Day 22 CART cells were co-cultured with OPM-2 tumor cells at a 1:1  
226 E:T ratio for five days (Paired two-sided t-test, average of two technical replicates for three  
227 biological replicates). **b.** The percent of CD3<sup>+</sup> cells producing three or more inhibitory receptors  
228 on Day 22 as determined with flow cytometric detection of CD3, PD-1, CTLA-4, TIM-3, and LAG-  
229 3 (Paired two-sided t-test, average of two technical replicates for three biological replicates). **c-d.**  
230 Line graphs and representative flow plots showing the percent of CD3<sup>+</sup> cells producing IL-2 and  
231 IFN- $\gamma$  as determined by intracellular staining and flow cytometry after Day 22 CART cells were  
232 co-cultured with OPM-2 cells at a 1:5 E:T ratio for four hours (Paired two-sided t-test, average of  
233 two technical replicates for three biological replicates). Source data are provided as a Source  
234 Data file.

Supplementary Figure S17

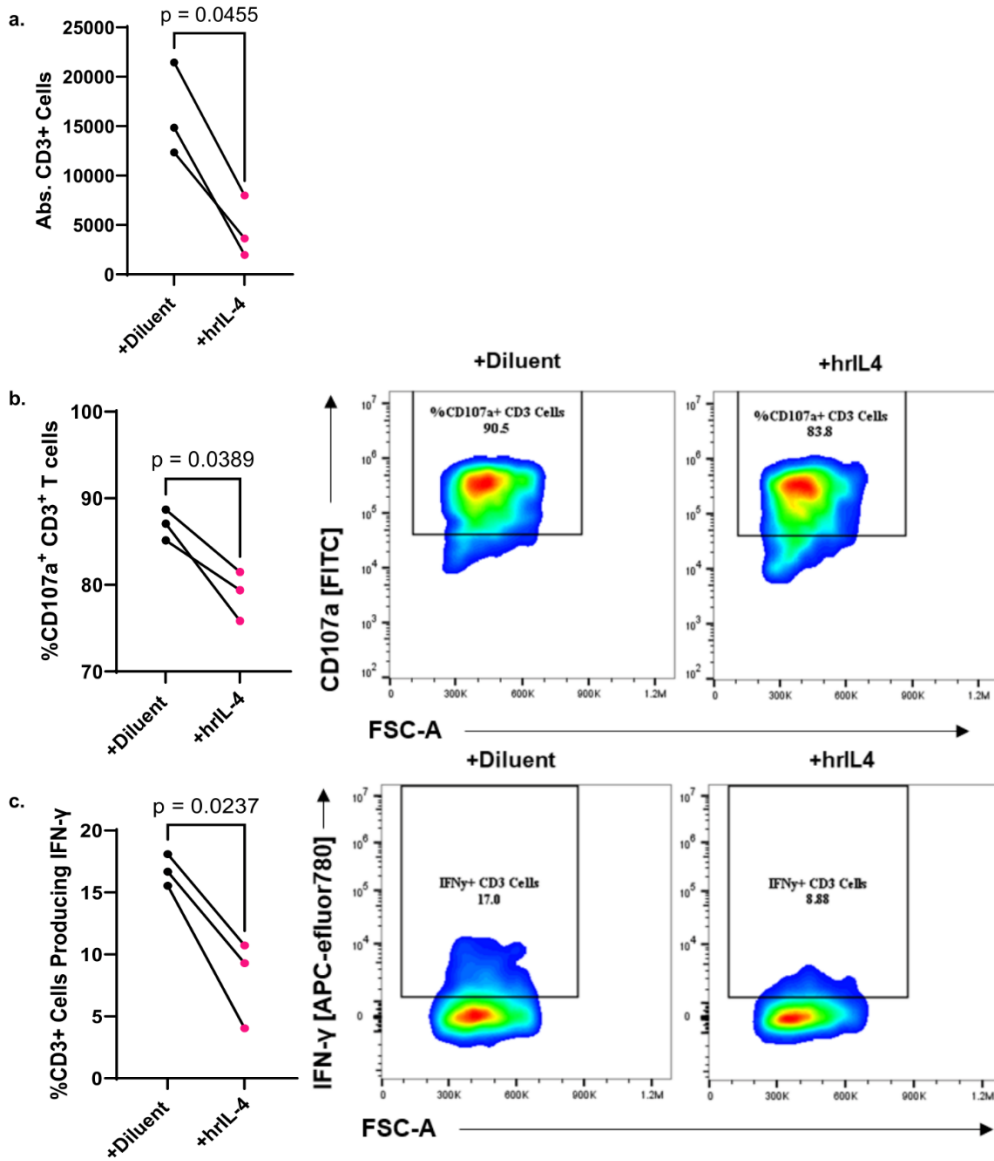

235

236 Supplementary Figure S17. **IL-4 causes CART cell dysfunction in CART cells targeting CS1**

237 **and containing a CD28 costimulatory domain (CS1 CART-28ζ).** a-c. CS1 CART-28ζ cells

238 were chronically stimulated with OPM-2 tumor cells in the presence of either 20ng/mL hrIL-4 or

239 diluent from Day 8 to Day 22 of the in vitro model for exhaustion. **a.** Absolute count of CD3<sup>+</sup> cells

240 after Day 22 CART cells were co-cultured with OPM-2 tumor cells at a 1:1 E:T ratio for five days

241 (Paired two-sided t-test, average of two technical replicates for three biological replicates). **b.** Line

242 graph and representative flow plots showing the percent of CD3<sup>+</sup> cells expressing CD107a as  
243 determined with flow cytometry after Day 22 CART cells were co-cultured with OPM-2 cells at a  
244 1:5 E:T ratio for four hours (Paired two-sided t-test, average of two technical replicates for three  
245 biological replicates) **c.** Line graph and representative flow plots showing the percent of CD3<sup>+</sup>  
246 cells producing IFN- $\gamma$  as determined by intracellular staining after Day 22 CART cells were co-  
247 cultured with OPM-2 cells at a 1:5 E:T ratio for four hours (Paired two-sided t-test, average of two  
248 technical replicates for three biological replicates). Source data are provided as a Source Data  
249 file.

Supplementary Figure S18

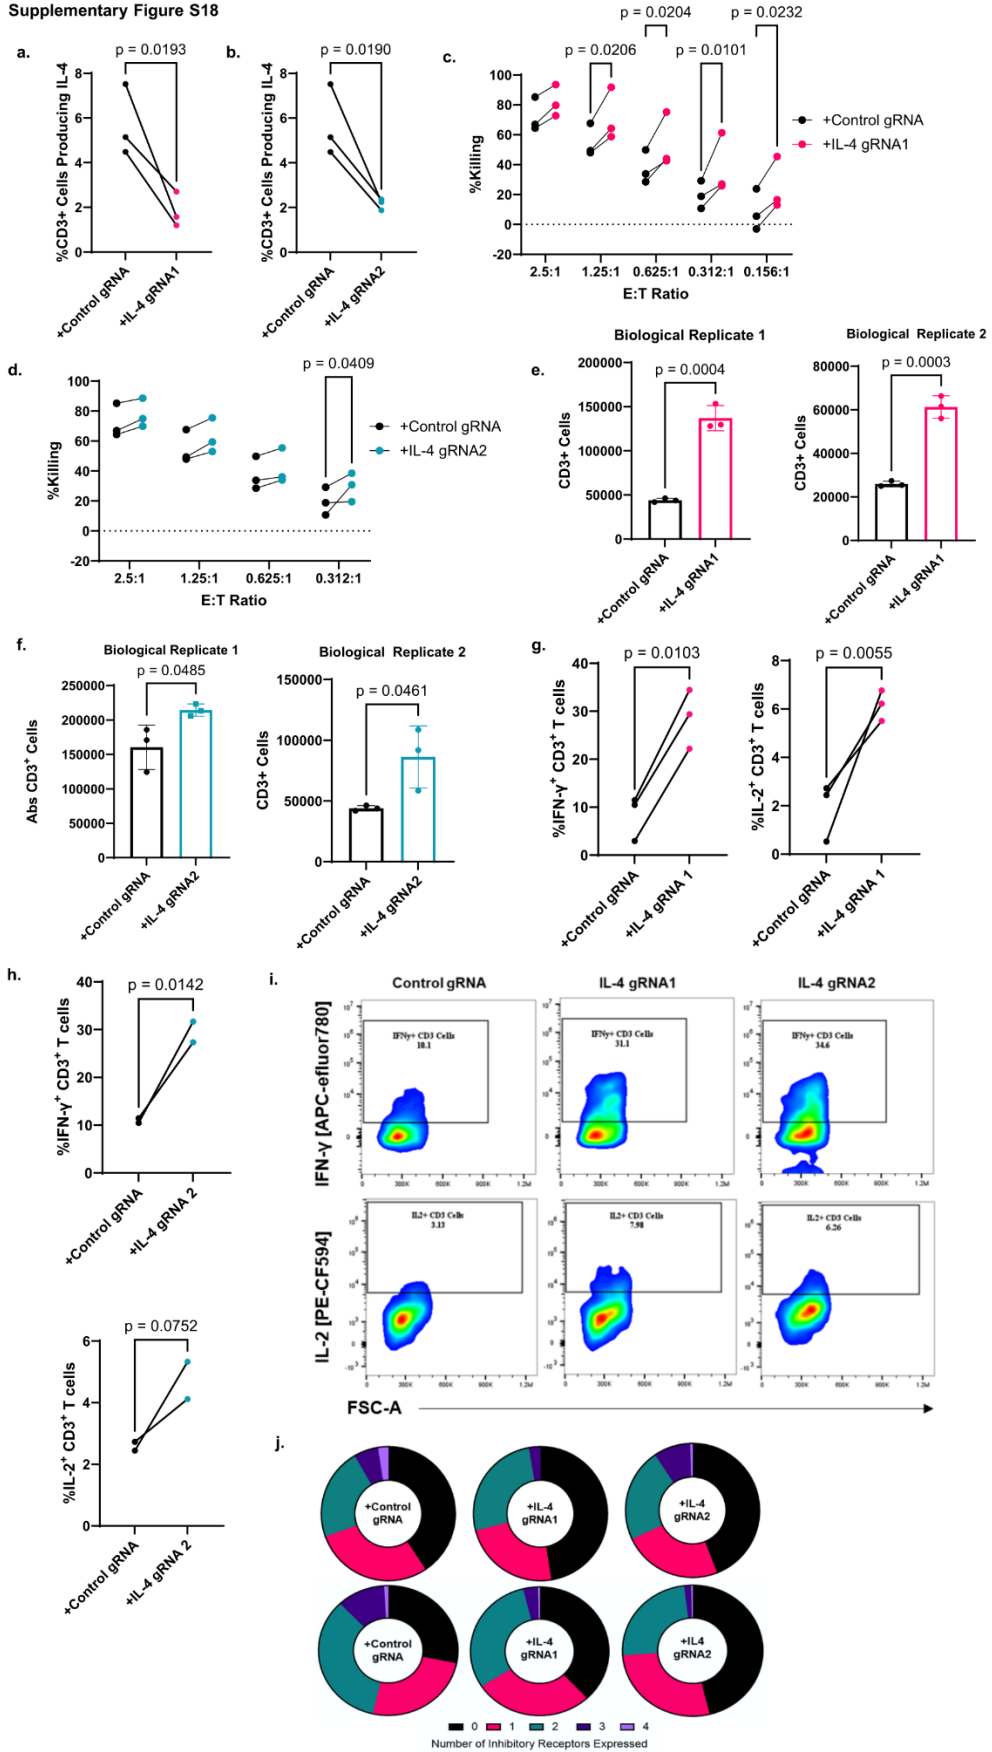



251 Supplementary Figure S18. **IL-4 knockdown reduces signs of exhaustion in CART19-28 $\zeta$**   
252 **cells. a-j.** During CART cell production, CART19-28 $\zeta$  cells were transduced with a lentiCRISPRv2  
253 plasmid containing a gRNA targeting IL-4 (gRNA1 or gRNA2) or a non-targeting gRNA (Control  
254 gRNA). **a-b.** The production of IL-4 by Day 8 CART19-28 $\zeta$  cells as determined by intracellular  
255 staining after co-culturing CART cells with JeKo-1 tumor cells at a 1:5 E:T ratio for four hours  
256 (Paired two-sided t-test, average of two technical replicates for three biological replicates). **c-d.**  
257 Percent killing as measured with bioluminescent imaging after Day 8 CART19-28 $\zeta$  cells were co-  
258 cultured with luciferase<sup>+</sup> JeKo-1 cells at various E:T cell ratios for 48 hours (Paired two-way  
259 ANOVA, average of two technical replicates for three biological replicates). **e-f.** The absolute  
260 CD3<sup>+</sup> count as determined by flow cytometry after Day 15 CART cells were co-cultured with JeKo-  
261 1 cells at a 1:1 E:T ratio for 5-days (Unpaired two-sided t-test, plots from individual biological  
262 replicates, three technical replicates, mean +/- SD). **g-i.** Line graphs and representative flow plots  
263 showing the production of effector cytokines such as IFN- $\gamma$  and IL-2 as determined through  
264 intracellular staining after Day 15 CART cells were co-cultured with JeKo-1 cells at a 1:5 E:T ratio  
265 for four hours (Paired two-sided t-test, average of two technical replicates for each biological  
266 replicate). **j.** Circle graph depicting the percent of CD3<sup>+</sup> cells expressing multiple inhibitory  
267 receptors (0 – black, 1 – pink, 2- green, 3 – dark purple, 4 – light purple) on Day 15 as determined  
268 by flow cytometric staining for CD3, PD-1, CTLA-4, TIM-3, and LAG-3 (Circle plots from two  
269 biologic replicates). Source data are provided as a Source Data file.

Supplementary Figure S19

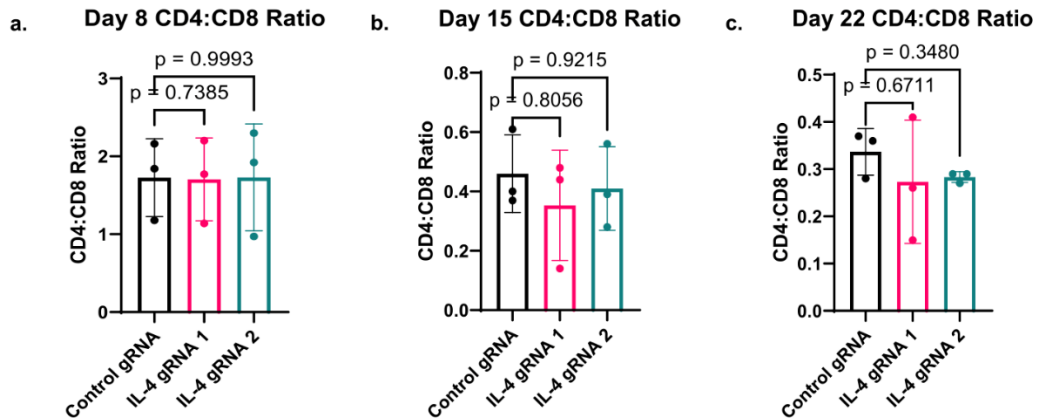

270

271 Supplementary Figure S19. **CRISPR/Cas9 knockout of IL-4 does not skew the CD4:CD8 ratio**

272 **at baseline or following chronic stimulation. a-c.** The ratio of CD4:CD8 cells at Day 8, Day 15,

273 and Day 22 of the in vitro model for exhaustion in CART19-28 $\zeta$  cells transduced with a

274 CRISPR/Cas9 virus containing either a non-targeting gRNA (Control gRNA) or a gRNA targeting

275 IL-4 (One-way ANOVA, average of two technical replicates for three biological replicates, mean

276 +/- SD). Source data are provided as a Source Data file.

Supplementary Figure S20

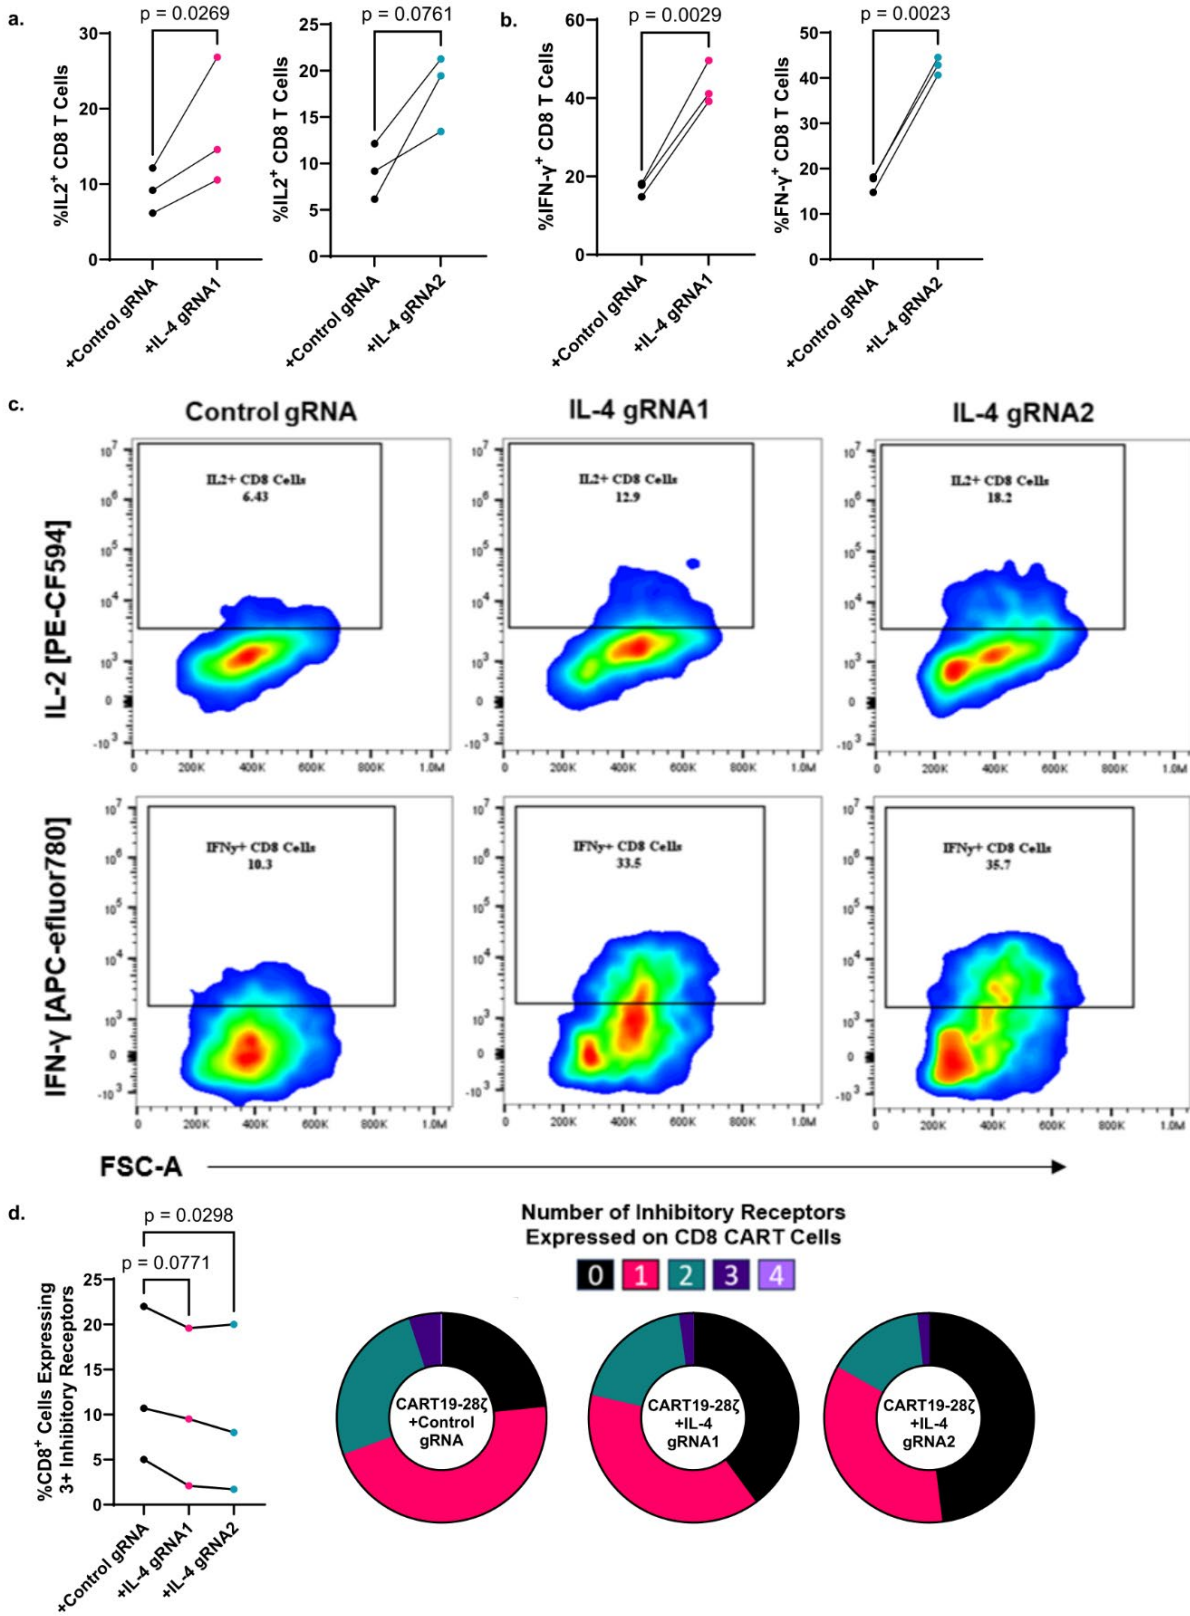

278 Supplementary Figure S20. **IL-4 knockdown reduces signs of exhaustion in CD8<sup>+</sup> CART19-**  
279 **28ζ cells. a-c.** Line graphs and representative flow plots showing the production of effector  
280 cytokines such as IL-2 and IFN-γ by CD8<sup>+</sup> CART cells. Determined through intracellular staining  
281 after Day 15 CART cells were co-cultured with JeKo-1 cells at a 1:5 E:T ratio for four hours (Paired  
282 two-sided t-test, average of two technical replicates for each biological replicate). **d.** Line graph  
283 and circle graphs depicting the percent of CD8<sup>+</sup> cells expressing multiple inhibitory receptors (0 –  
284 black, 1 – pink, 2- green, 3 – dark purple, 4 – light purple) on Day 15 as determined by flow  
285 cytometric staining for CD3, PD-1, CTLA-4, TIM-3, and LAG-3 (One-way ANOVA, average of two  
286 technical replicates for three biological replicates, circle plots from one representative biological  
287 replicate). Source data are provided as a Source Data file.

Supplementary Figure S21

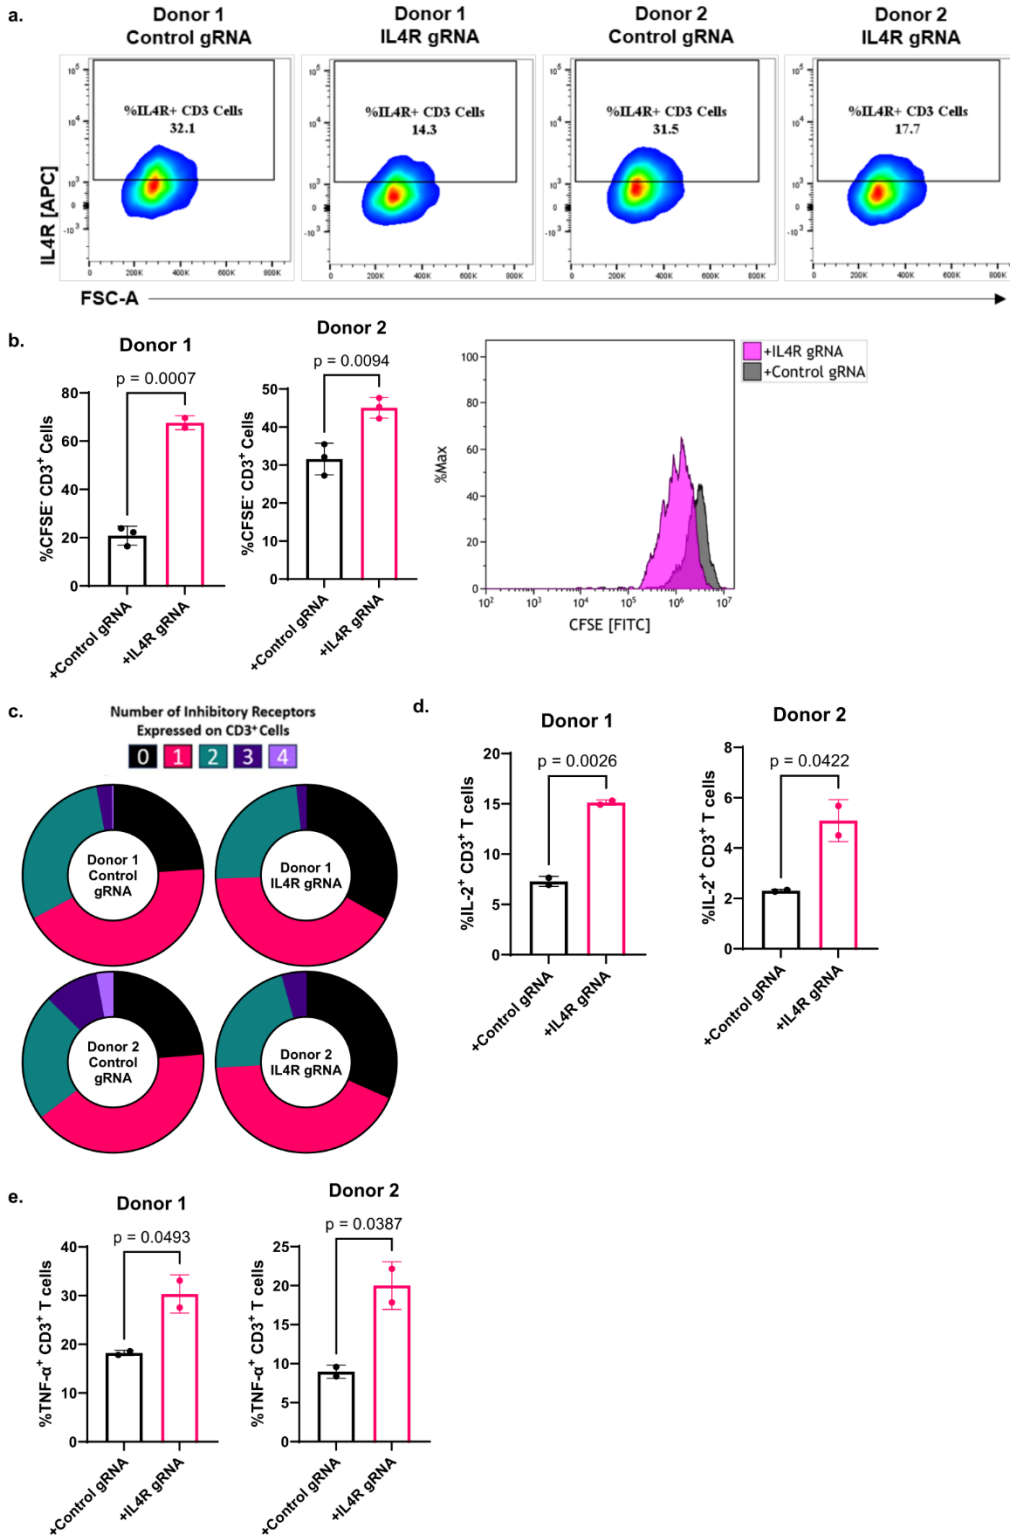

289 Supplementary Figure S21. **IL4R knockdown reduces signs of exhaustion in CART19-28ζ**  
290 **cells. a-e.** During CART cell production, CART19-28ζ cells were transduced with a  
291 lentiCRISPRv2 plasmid containing a gRNA targeting IL4R or a non-targeting gRNA (Control  
292 gRNA). **a.** Representative flow plots from two biological replicates (donors) showing the  
293 expression of IL4R on Day 8 CART19-28ζ cells. **b.** Bar plots and representative histogram  
294 showing the change in the percent of CFSE<sup>-</sup> CART cells when CFSE stained Day 22 CART cells  
295 were co-cultured with JeKo-1 tumor cells at a 1:1 E:T ratio for 5 days. (Unpaired two-sided t-test,  
296 plots from individual biological replicates, three technical replicates, mean +/- SD). **c.** Circle  
297 graphs depicting the percent of CD3<sup>+</sup> cells expressing multiple inhibitory receptors (0 – black, 1 –  
298 pink, 2- green, 3 – dark purple, 4 – light purple) on Day 22 as determined by flow cytometric  
299 staining for CD3, PD-1, CTLA-4, TIM-3, and LAG-3 (Circle plots from two biologic replicates). **d-**  
300 **e.** Bar graphs showing the production of IL-2 and TNF-α by CD3<sup>+</sup> CART cells as determined  
301 through intracellular staining after Day 22 CART cells were co-cultured with JeKo-1 cells at a 1:5  
302 E:T ratio for four hours (Unpaired two-sided t-test, plots from individual biological replicates, two  
303 technical replicates, mean +/- SD). Source data are provided as a Source Data file.

Supplementary Figure S22

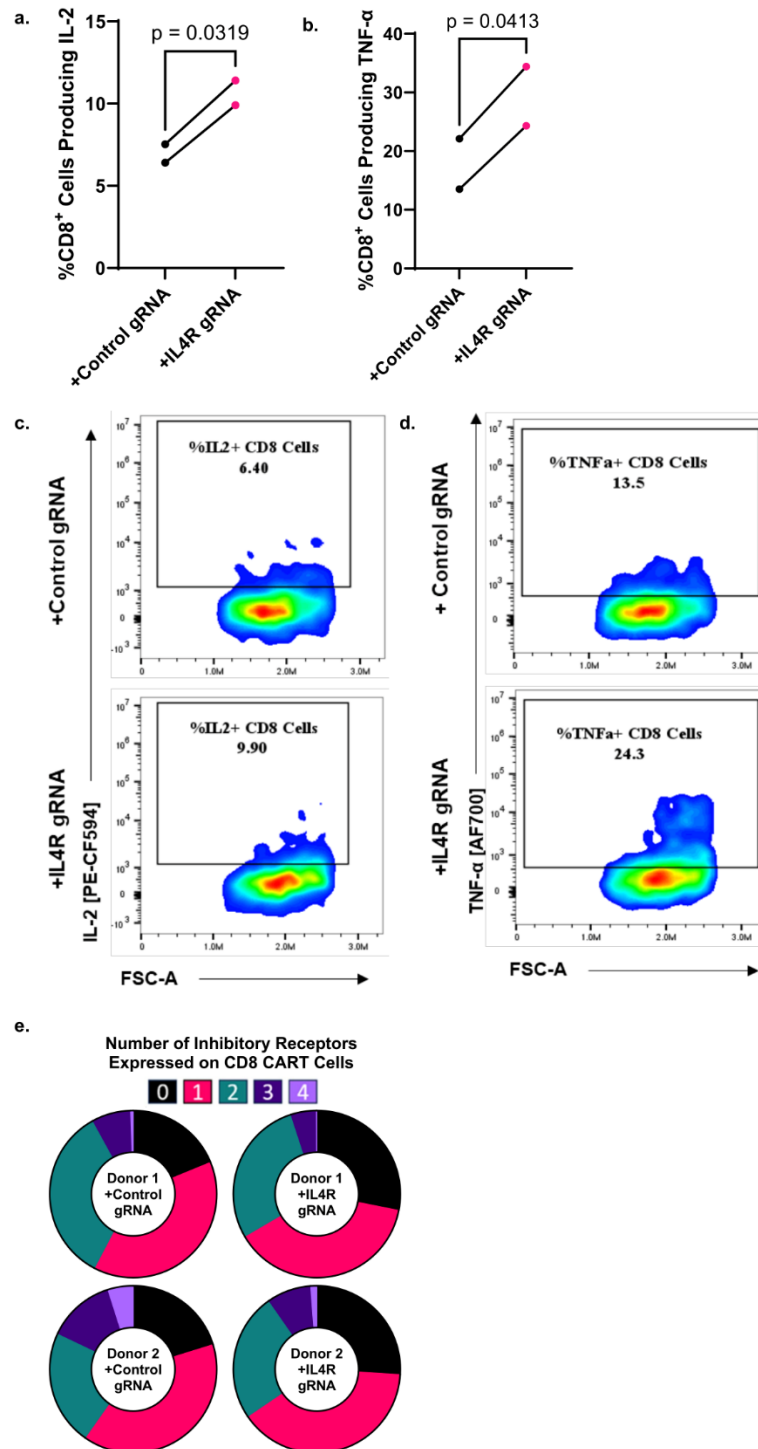

304

305 Supplementary Figure S22. IL4R knockdown reduces signs of exhaustion in CD8<sup>+</sup> CART19-

306 28ζ cells. a-e. During CART cell production, CART19-28ζ cells were transduced with a

307 lentiCRISPRv2 plasmid containing a gRNA targeting IL4R or a non-targeting gRNA (Control  
308 gRNA). **a-d.** Line and representative flow plots showing the production of IL-2 and TNF- $\alpha$  by CD8<sup>+</sup>  
309 CART cells as determined through intracellular staining after Day 22 CART cells were co-cultured  
310 with JeKo-1 cells at a 1:5 E:T ratio for four hours (Paired two-sided t-test, average of two technical  
311 replicates for two biological replicates). **e.** Circle graphs depicting the percent of CD8<sup>+</sup> cells  
312 expressing multiple inhibitory receptors (0 – black, 1 – pink, 2- green, 3 – dark purple, 4 – light  
313 purple) on Day 15 as determined by flow cytometric staining for CD3, CD8, PD-1, CTLA-4, TIM-  
314 3, and LAG-3. Source data are provided as a Source Data file.



Supplementary Figure S23

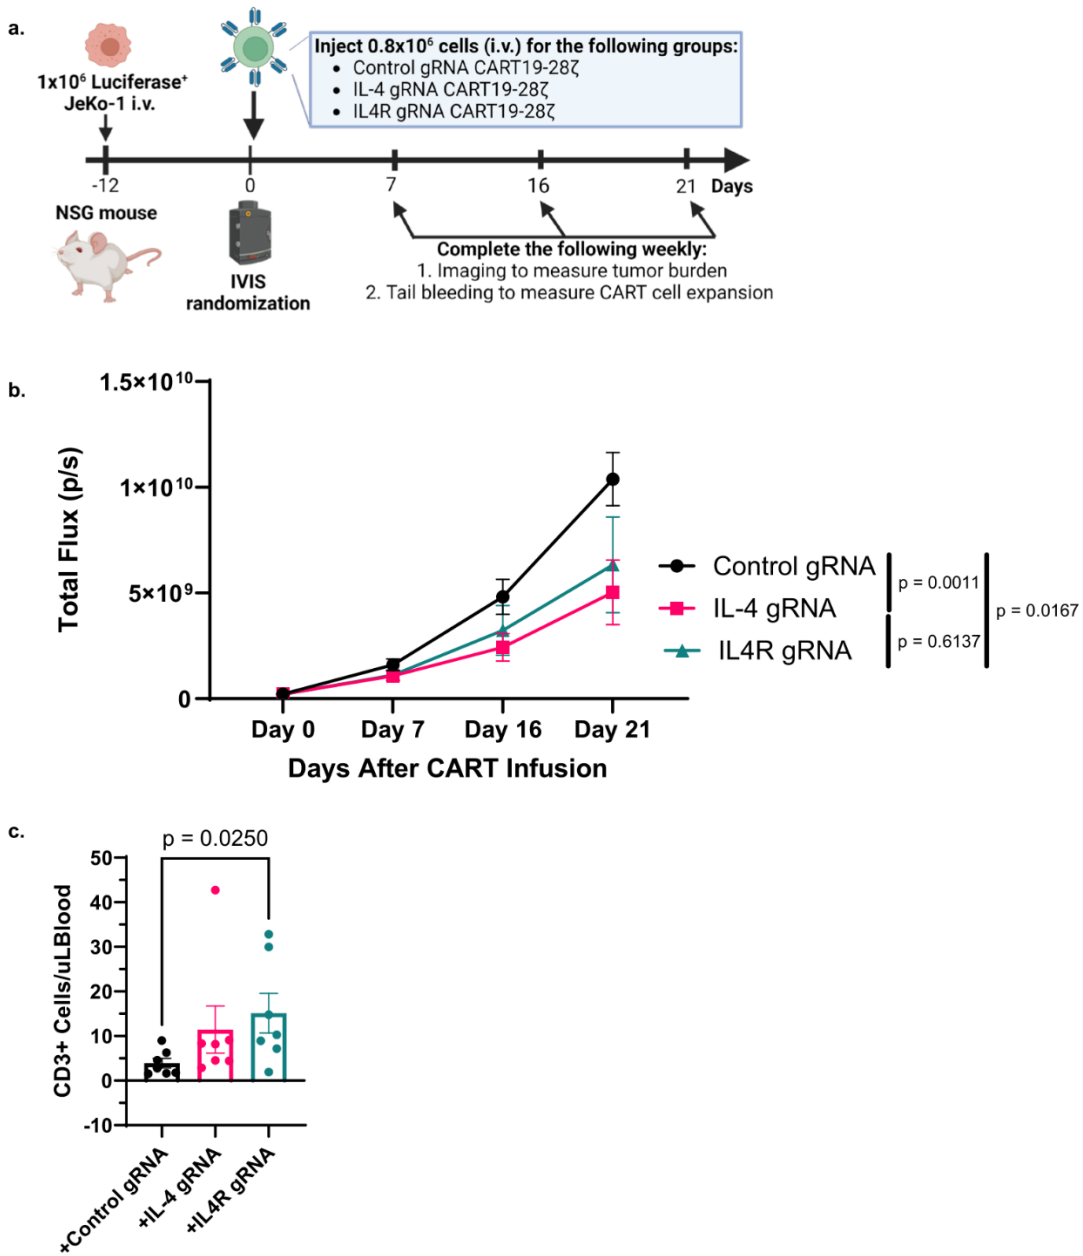

315

316 Supplementary Figure S23. **IL-4 and IL4R knockdown improves CART19-28zeta cell activity in**

317 **a JeKo-1 xenograft model.** **a.** Schematic depicting an in vivo mantle cell lymphoma xenograft

318 mouse model to induce stress in CART19 cells (Supplementary Figure S23a was created with

319 BioRender.com released under a Creative Commons Attribution-NonCommercial-NoDerivs 4.0

320 International license). **b.** Tumor burden over time in a mantle cell lymphoma xenograft mouse

321 model as determined by bioluminescence imaging of the luciferase<sup>+</sup> tumor (Two-way ANOVA,  
 322 n=7 mice per group, mean +/- SEM) c. Absolute human CD3<sup>+</sup> cells per  $\mu$ L of peripheral blood as  
 323 determined by flow cytometry on Day 19 of a mantle cell lymphoma xenograft mouse model (One-  
 324 way ANOVA, n=7 mice per group, mean +/- SEM). Source data are provided as a Source Data  
 325 file.

Supplementary Figure S24

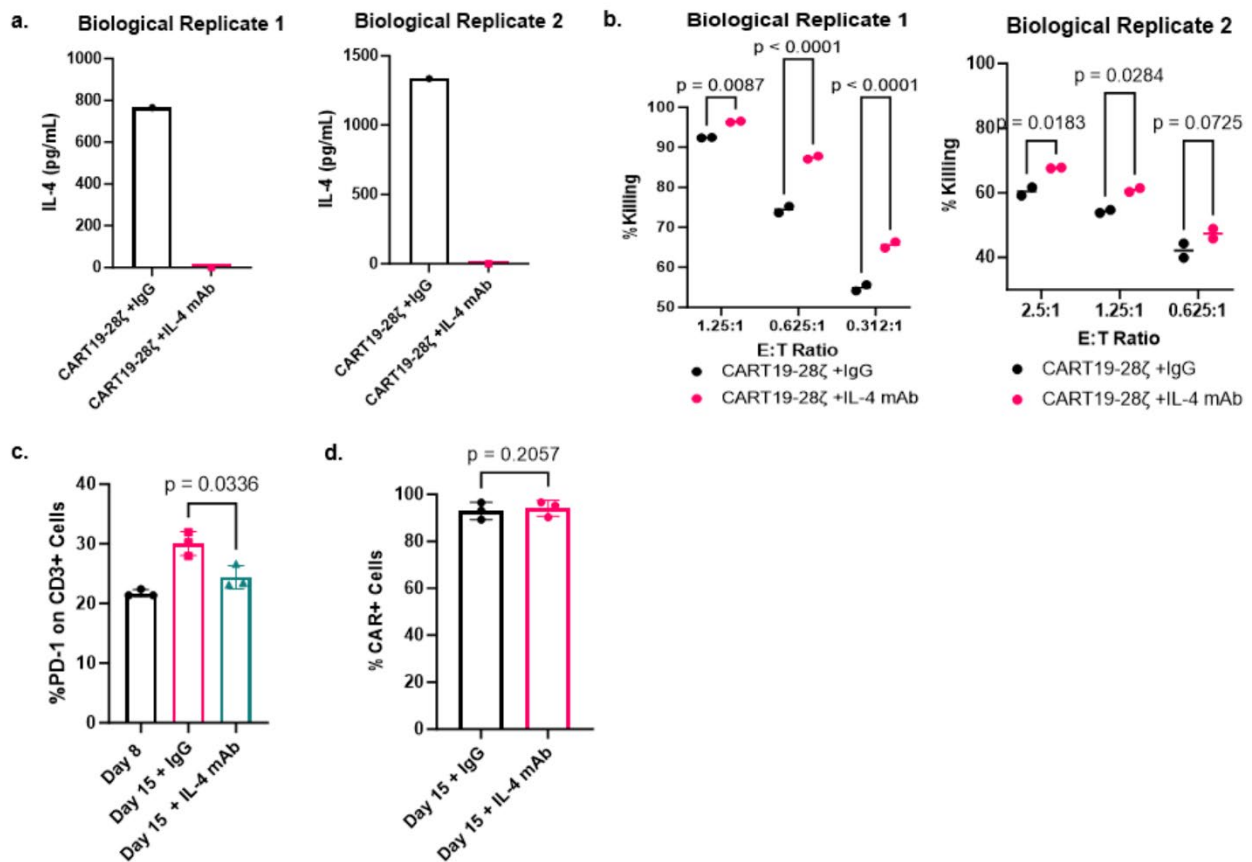

326  
 327 **Supplementary Figure S24. The effect of IL-4 neutralization with a mAb on CART19-**  
 328 **28zeta function in vitro. a.** The concentration of IL-4 in the supernatant after CART19-28zeta  
 329 cells were co-cultured with JeKo-1 target cells at a 1:1 E:T ratio for three days in the  
 330 presence of either 10 $\mu$ g/mL IL-4 mAb or IgG control antibody (results from two biological  
 331 replicates). **b.** Cytotoxicity of CART19-28zeta cells that were co-cultured with luciferase<sup>+</sup>  
 332 JeKo-1 targets cells at various E:T ratios in the presence of either 10 $\mu$ g/mL IL-4 mAb or

333 IgG control antibody for 48 hours (Two-way ANOVA, results from two biological replicates,  
334 two technical replicates per biological replicate). **c.** The percent of CD3<sup>+</sup> cells that are  
335 positive for PD-1 at Day 8 and Day 15 after being chronically stimulated with JeKo-1 cells  
336 in the presence of either 10µg/mL IL-4 mAb or IgG control antibody from Day 8 to Day 15  
337 (One-way ANOVA, average of two technical replicates for three biological replicates,  
338 mean +/- SD). **d.** The percent of CAR<sup>+</sup> cells following chronic stimulation (Day 15) in the  
339 presence of 10µg/mL IL-4 mAb or IgG control antibody as determined by ProteinL staining  
340 for flow cytometry. (Paired two-sided t-test, average of two technical replicates for three  
341 biological replicates, mean +/- SD). Source data are provided as a Source Data file.

Supplementary Figure S25

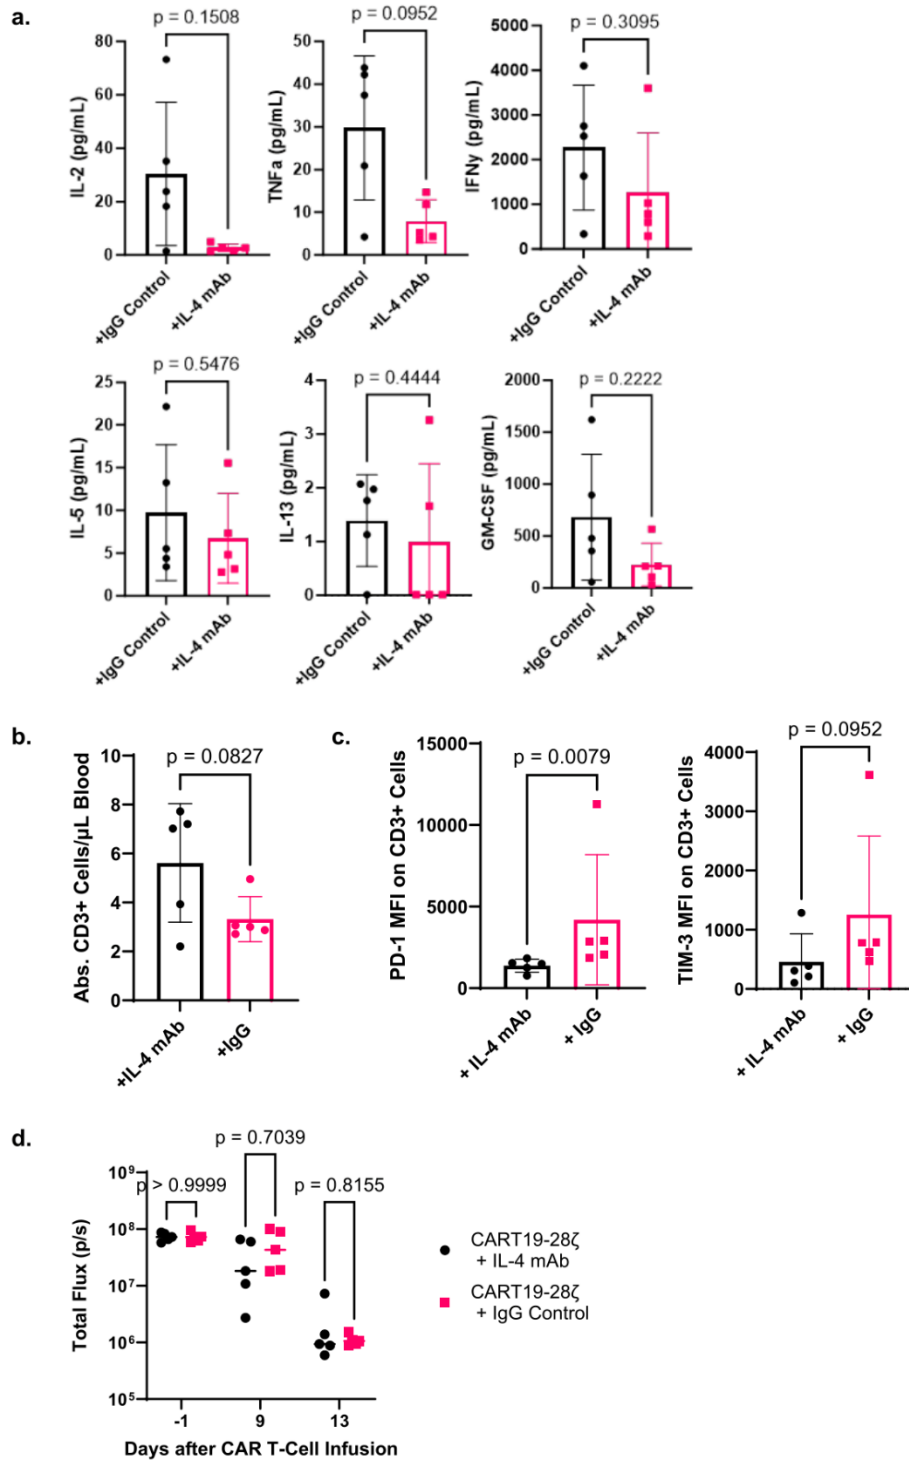

342

343 Supplementary Figure S25. The effect of IL-4 neutralization on CART19-28 $\zeta$  efficacy in stress

344 and low tumor burden mantle cell lymphoma xenograft mouse models. a. Individual plots

345 showing the concentration of detected cytokines on week two of the mantle cell lymphoma  
 346 xenograft stress mouse model treated with Day 8 CART19-28ζ cells in combination with either  
 347 10mg/kg IL-4 mAb or IgG control antibody. (two-sided t-test, n=5 mice per group, mean +/- SD).  
 348 **b.** CART cell expansion in vivo as determined by absolute hCD45<sup>+</sup>CD3<sup>+</sup> count by flow cytometry  
 349 per μL of blood two weeks following CART cell infusion in a low tumor burden mantle cell  
 350 lymphoma xenograft mouse model (two-sided t-test, n=5 mice per group, mean +/- SD). **c.** The  
 351 mean fluorescence intensity of the inhibitory receptors PD-1 and TIM-3 by flow cytometry on  
 352 CART cells in mice treated with either CART19-28ζ cells and 10mg/kg IL-4 mAb or CART19-28ζ  
 353 cells and 10mg/kg IgG control antibody on week two of a low tumor burden mantle cell lymphoma  
 354 xenograft mouse model (two-sided t-test, n=5 mice per group, mean +/- SD). **d.** Tumor  
 355 progression as measured with bioluminescence imaging of luciferase<sup>+</sup> JeKo-1 cells in a low tumor  
 356 burden mantle cell lymphoma xenograft mouse model where the mice were treated with CART19-  
 357 28ζ cells in combination with either 10mg/kg IL-4 mAb or IgG control antibody (Two-way ANOVA  
 358 with n=5 mice per group). Source data are provided as a Source Data file.

Supplementary Figure S26

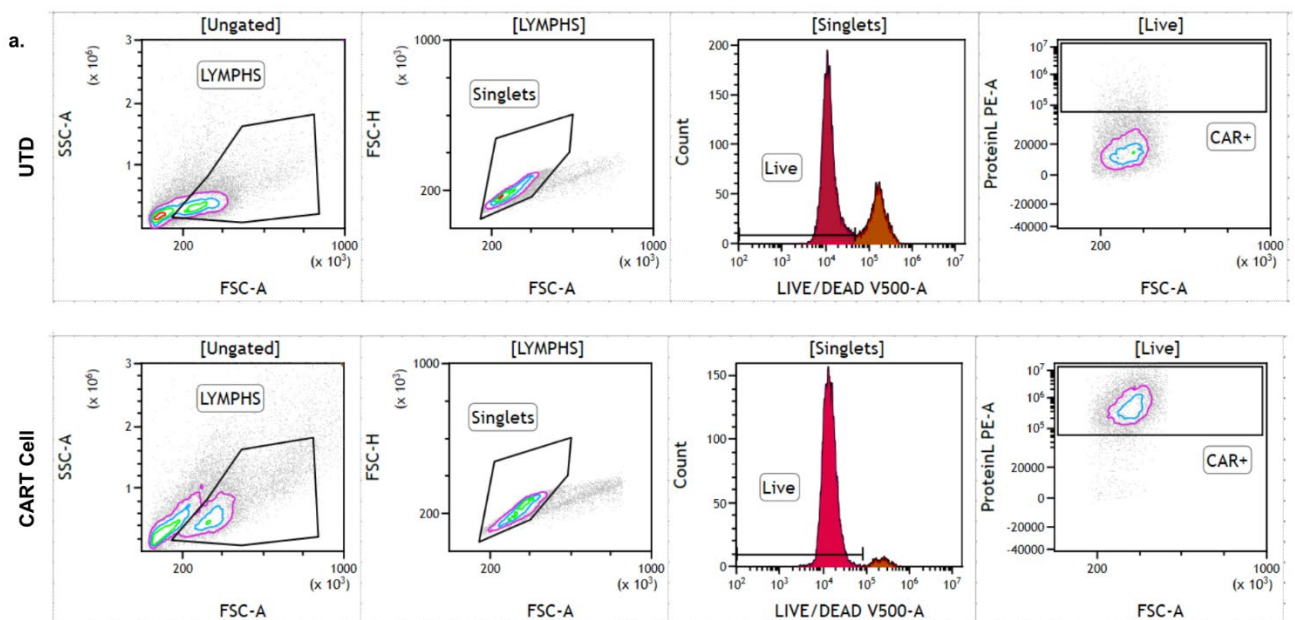

360 Supplementary Figure S26. **Representative flow plot for the determination of CAR**  
 361 **percentage.** **a.** Representative flow plots showing the determination of CAR positivity. Positive  
 362 gating for ProteinL PE is determined through staining of untransduced (UTD) T cells with ProteinL  
 363 PE.

Supplementary Figure S27

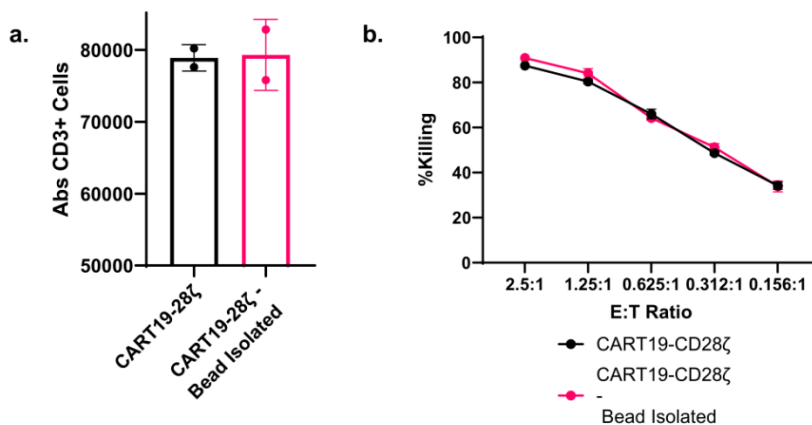

364  
 365 Supplementary Figure S27. **The use of CD4<sup>+</sup> and CD8<sup>+</sup> beads to separate CART cells from**  
 366 **co-culture does not impact functionality.** **a.** Absolute CD3<sup>+</sup> cell count as determined by flow  
 367 cytometry after culturing CART19-28ζ cells that had either undergone bead separation or not,  
 368 with JeKo-1 target cells at a 1:1 E:T cell ratio for 5-days (One biological replicate and two technical  
 369 replicates, mean +/- SD). **b.** Cytotoxicity of CART19-28ζ cells that either underwent bead  
 370 separation or did not before culture with luciferase<sup>+</sup> JeKo-1 target cells at various E:T ratios for  
 371 48 hours (One biological replicate and two technical replicates). Source data are provided as a  
 372 Source Data file.

Supplementary Figure S28

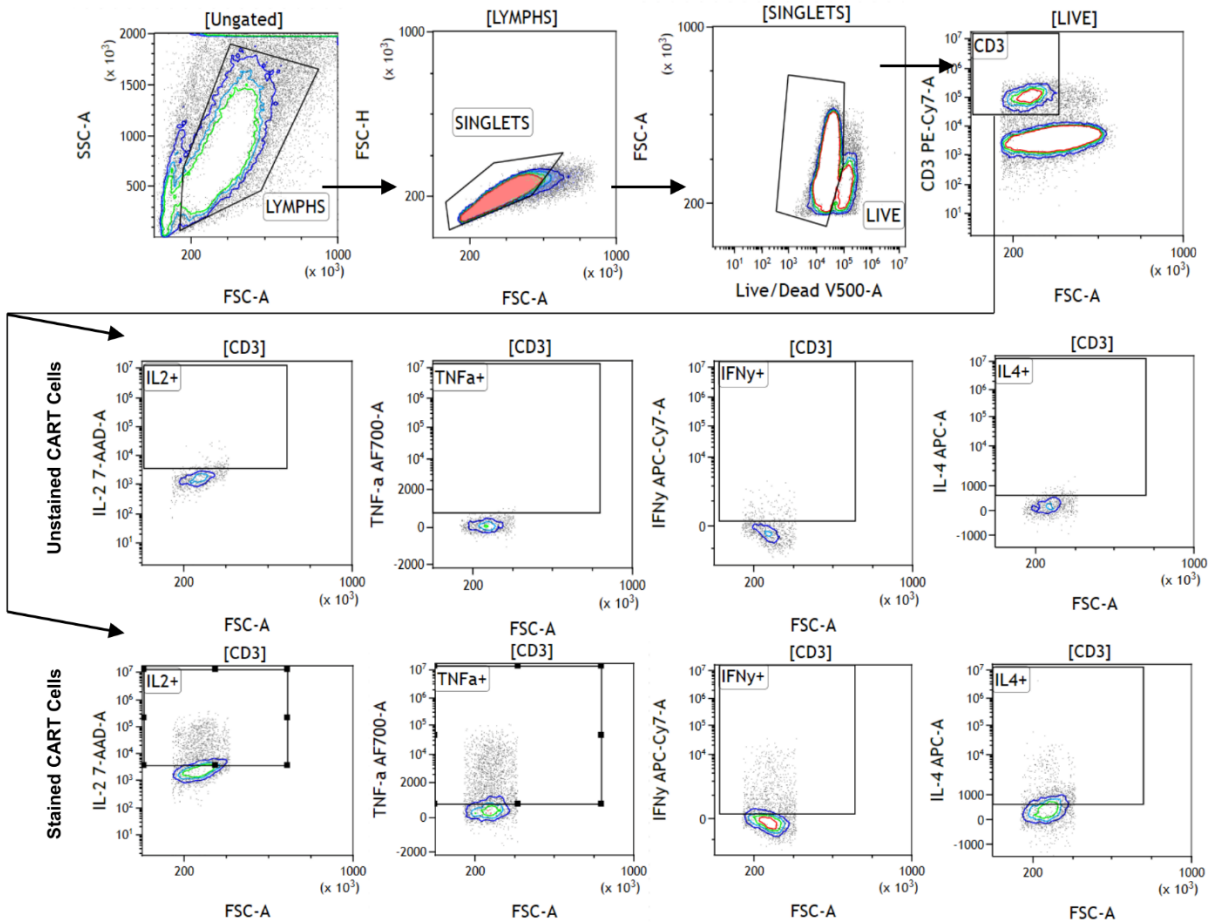

373

374 Supplementary Figure S28. **Example gating strategy used to determine the percentage of T**  
375 **cells producing cytokines.** Unstained CART cells were used to determine positive gating for  
376 cytokines of interest in the stained CART samples. (Figures generated in Kaluza, contour with  
377 outliers, the colors represent density with the least dense being black, then dark blue, then light  
378 blue, then green, and then red).

Supplementary Figure S29

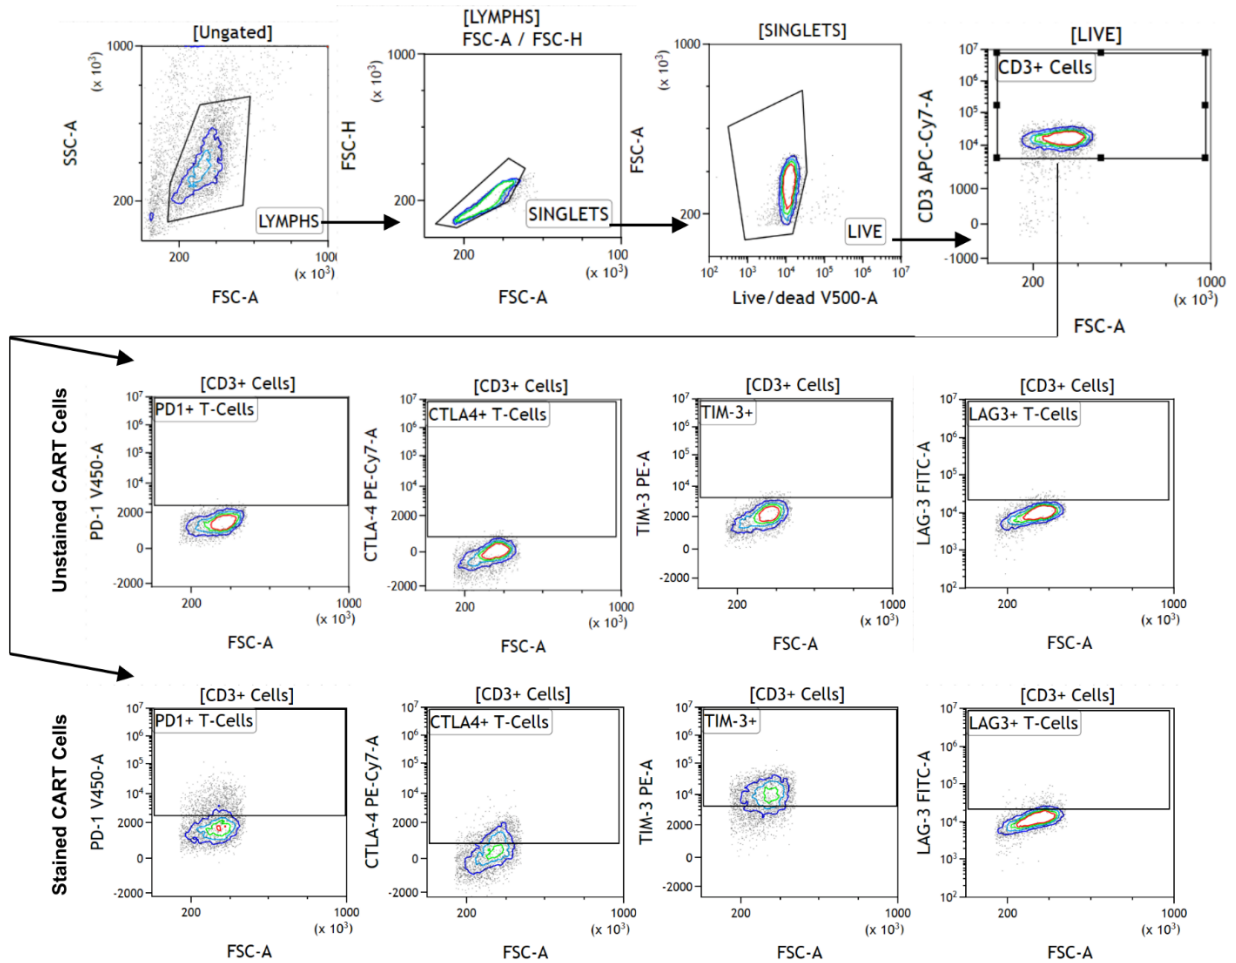

379

380 Supplementary Figure S29. **Example gating strategy used to determine the percentage of T**  
381 **cells positive for inhibitory receptors.** Unstained CART cells were used to determine positive  
382 gating for each inhibitory receptor (PD-1, CTLA-4, TIM-3, and LAG-3) in the stained CART  
383 samples. (Figures generated in Kaluza, contour with outliers, the colors represent density with  
384 the least dense being black, then dark blue, then light blue, then green, and then red).



Supplementary Figure S30

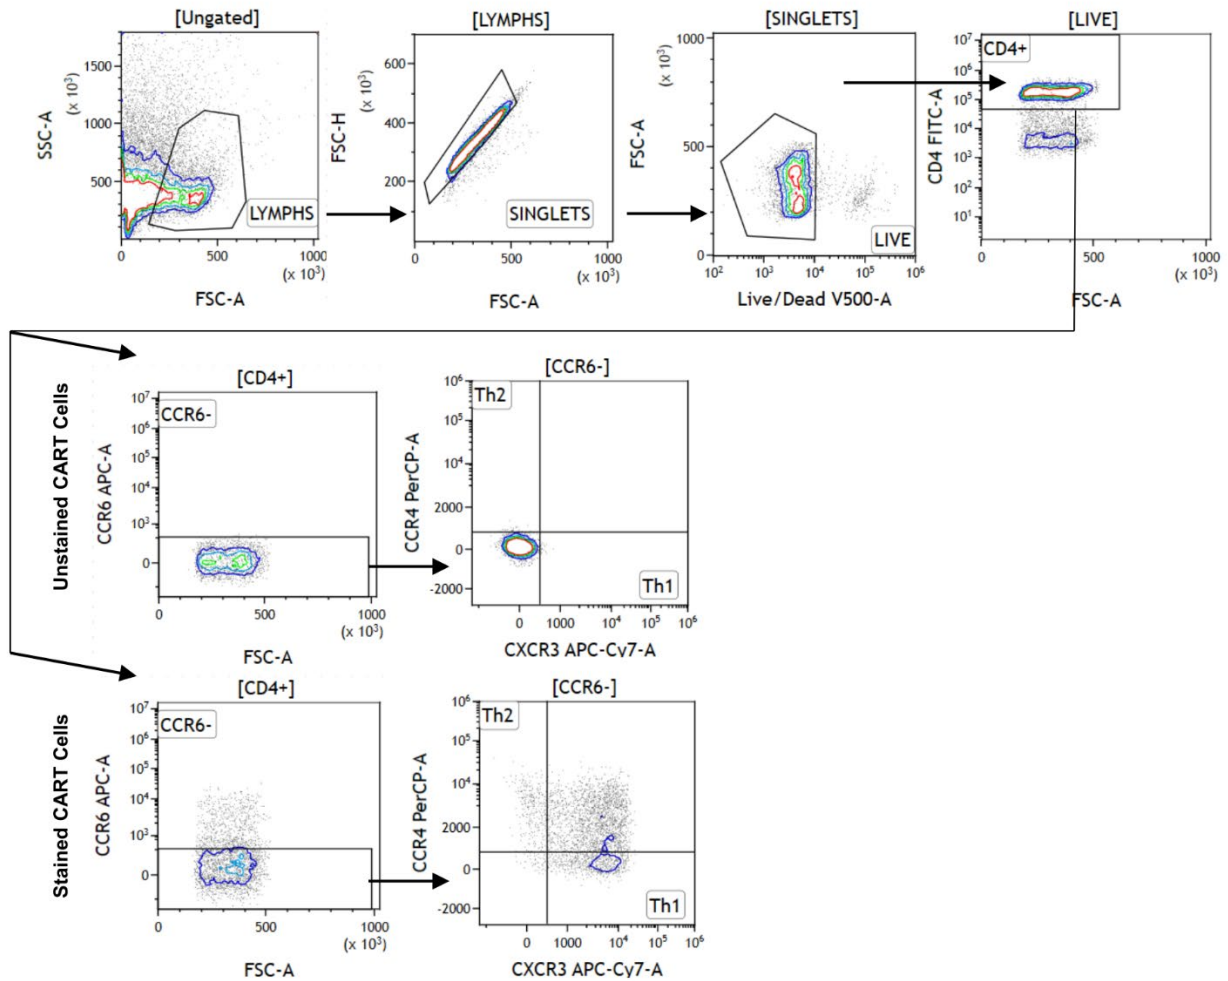

385

386 Supplementary Figure S30. **Example gating strategy used to determine the percentage of**

387 **Th1 or Th2 CD4<sup>+</sup> T cells.** Unstained CART cells were used to determine positive gating in the

388 stained CART samples. (Figures generated in Kaluza, contour with outliers, the colors represent

389 density with the least dense being black, then dark blue, then light blue, then green, and then

390 red). Th1 cells are defined as CD4<sup>+</sup> CCR6<sup>-</sup> CCR4<sup>-</sup> CXCR3<sup>+</sup> and Th2 cells are defined as

391 CD4<sup>+</sup> CCR6<sup>-</sup> CCR4<sup>+</sup> CXCR3<sup>-</sup>.

Supplementary Figure S31

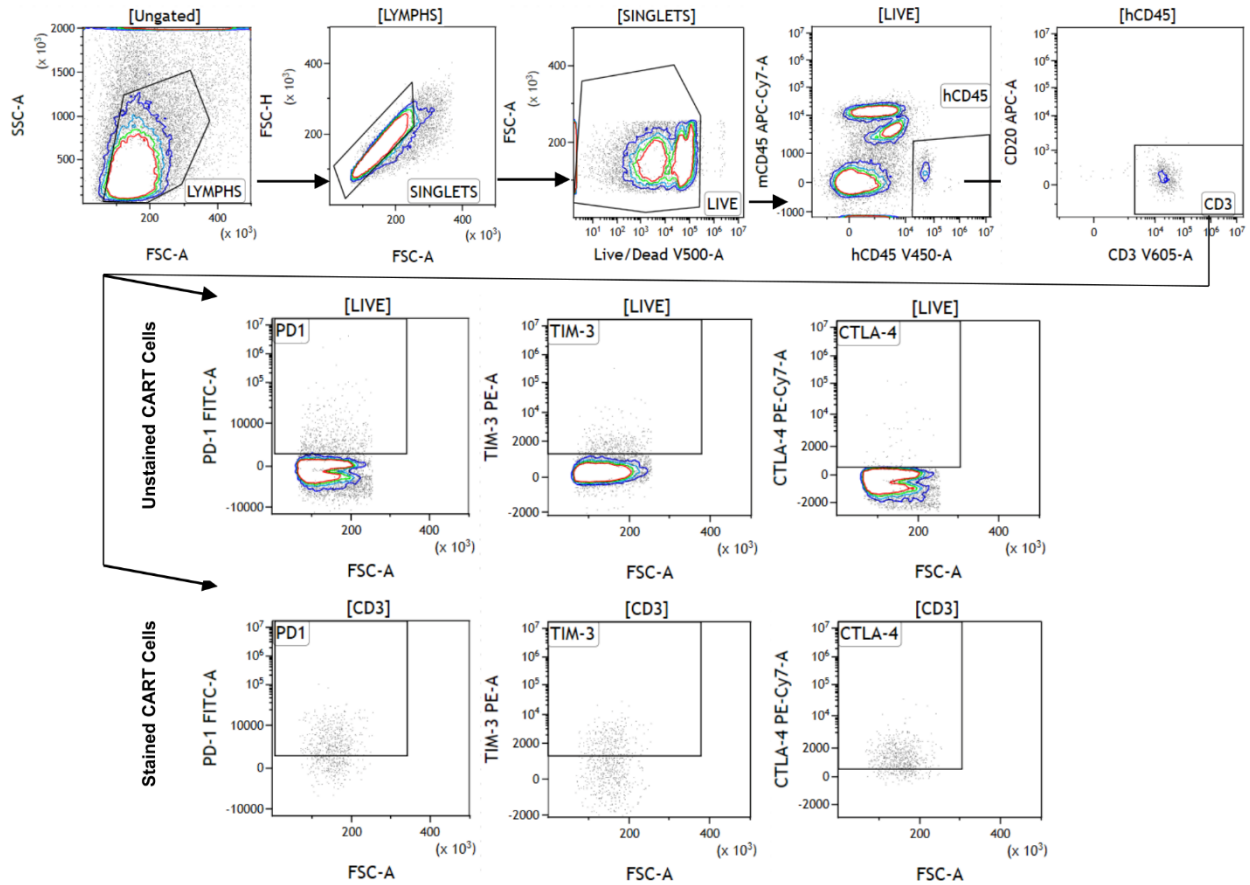

392

393 Supplementary Figure S31. **Example gating strategy used to evaluate the expansion of**

394 **human T cell expansion in NSG mice.** Unstained CART cells were used to determine positive

395 gating in the stained CART samples. (Figures generated in Kaluza, contour with outliers, the

396 colors represent density with the least dense being black, then dark blue, then light blue, then

397 green, and then red).

398
