# Supplementary material for: IL-4 drives exhaustion of CD8+ CART cells
Source: PubMed Central journal article supplement — Nat Commun. 2024 Sep 12;15:7921. doi: 10.1038/s41467-024-51978-3 (PMC11393358; doi:10.1038/s41467-024-51978-3), 2024-09-12
Supplement: 41467_2024_51978_MOESM3_ESM.pdf [file 41467_2024_51978_MOESM3_ESM.pdf]

## **Description of Additional Supplementary Files**

### **File Name: Supplementary Data 1**

**Description:** Raw Count File from RNA Sequencing of Pre-Infusion CART Cell Products from the ZUMA-1 Clinical Trial

### **File Name: Supplementary Data 2-13**

**Description:** Non-Normalized Peak Files from ATAC Sequencing of Pre-Infusion CART Cell Products from 6 Responders and 6 Non-Responders in the ZUMA-1 Clinical Trial:

Supplementary Data 2: Responder 1

Supplementary Data 3: Responder 2

Supplementary Data 4: Responder 3

Supplementary Data 5: Responder 4

Supplementary Data 6: Responder 5

Supplementary Data 7: Responder 6

Supplementary Data 8: Non-Responder 1

Supplementary Data 9: Non-Responder 2

Supplementary Data 10: Non-Responder 3

Supplementary Data 11: Non-Responder 4

Supplementary Data 12: Non-Responder 5

Supplementary Data 13: Non-Responder 6
